# Supplementary material for: Compressed Sensing in On-Grid MIMO Radar
Source: ScientificWorldJournal. 2015 Sep 30;2015:397878. doi: 10.1155/2015/397878 (PMC4870333; doi:10.1155/2015/397878)
Supplement: Supplementary file 1 — The Supplementary Material accompanying this paper is a TAR file containing the MATLAB files needed to reproduce the results of the paper. These include the exact code used in each experiment, the resulting data sets from each experiment, and the code to generate the plots for each of these data sets. [file 397878.f1.tar › MFM_Radar_Reproducibles-2015-08-21/MFM_Radar_Reproducibles/Data and Plots/Experiment 1 Data and Plots/Experiment_1_Plots.m]

%% Plot the results of experiment 1
% First Plot the algorithms together
% Then plot the results for each algorithm separately

%% Plot the Algorithms Together
figure(1)
subplot(2,2,1)
plot(Sparsity_Levels, L1SQNN.AvgProbD(:,1),'-r.',Sparsity_Levels,L1L2CNN.AvgProbD(:,1),'-gs',Sparsity_Levels, AISS.AvgProbD(:,1),'-bo',Sparsity_Levels, OMP.AvgProbD(:,1),'-k*')
%axis([0 Sparsity_Levels(14)]);
xlabel('Sparsity Level','Fontsize',12)
ylabel('Avg Prob of Detection','Fontsize',12)
title({'Average Probability of Detection';['Random Arrays, SNR = ', num2str(SNR),' dB, Threshold = 0.001']},'Fontsize',12)
legend('L1SQNN','YALL1', 'AISS','OMP', 'Location','Best')
set(gca,'XTick',Sparsity_Levels)
grid;

subplot(2,2,2)
plot(Sparsity_Levels,L1L2CNN.AvgProbFA(:,1),'-gs',Sparsity_Levels, AISS.AvgProbFA(:,1),'-bo',Sparsity_Levels, OMP.AvgProbFA(:,1),'-k*',Sparsity_Levels,L1SQNN.AvgProbFA(:,1),'-r.')
%axis([0 Sparsity_Levels(end)]);
xlabel('Sparsity Level','Fontsize',12)
ylabel('Avg Prob of False Alarm','Fontsize',12)
title({'Average Probability of False Alarm';['Random Arrays, SNR = ', num2str(SNR),' dB, Threshold = 0.001']},'Fontsize',12)
legend('YALL1','AISS', 'OMP','L1SQNN', 'Location','Best')
set(gca,'XTick',Sparsity_Levels)
grid;

subplot(2,2,3)
plot(Sparsity_Levels,AISS.AvgRelErr(:,1),'-bo',Sparsity_Levels,OMP.AvgRelErr(:,1),'-k*',Sparsity_Levels,L1L2CNN.AvgRelErr(:,1),'-gs',Sparsity_Levels, L1SQNN.AvgRelErr(:,1),'-r.')
%axis([0 Sparsity_Levels(end)]);
xlabel('Sparsity Level','Fontsize',12)
ylabel('Avg Relative Error','Fontsize',12)
title({'Average Relative Error';['Random Arrays, SNR = ', num2str(SNR),' dB, Threshold = 0.001']},'Fontsize',12)
legend('AISS','OMP', 'YALL1','L1SQNN', 'Location','Best')
set(gca,'XTick',Sparsity_Levels)
grid;

subplot(2,2,4)
plot(Sparsity_Levels,L1L2CNN.AvgTime,'-gs',Sparsity_Levels, AISS.AvgTime,'-bo',Sparsity_Levels, L1SQNN.AvgTime,'-r.',Sparsity_Levels, OMP.AvgTime,'-k*')
%axis([0 Sparsity_Levels(end)]);
xlabel('Sparsity Level','Fontsize',12)
ylabel('Avg Recovery Time (seconds)','Fontsize',12)
title({'Average Recovery Time';['Random Arrays, SNR = ', num2str(SNR),' dB, Threshold = 0.001']},'Fontsize',12)
legend('YALL1','AISS', 'L1SQNN','OMP', 'Location','Best')
set(gca,'XTick',Sparsity_Levels)
grid;


%% Plot each Algorithm Separately
% The separate curves are associated with different threshold 
% levels, [.001,.01,.1], for detection

figure(2)

subplot(3,2,1)
plot(Sparsity_Levels, OMP.AvgProbD(:,1),'-k+',Sparsity_Levels,OMP.AvgProbD(:,2),'-bo',Sparsity_Levels, OMP.AvgProbD(:,3),'-rd')
%axis([0 Sparsity_Levels(end)]);
xlabel('Sparsity Level','Fontsize',12)
ylabel('Prob of True Detection','Fontsize',12)
title('\it{Average Probability of True Detection OMP}','Fontsize',12)

subplot(3,2,2)
plot(Sparsity_Levels,OMP.AvgProbFA(:,1),'-k+',Sparsity_Levels, OMP.AvgProbFA(:,2),'-bo',Sparsity_Levels, OMP.AvgProbFA(:,3),'-rd')
%axis([0 Sparsity_Levels(end)]);
xlabel('Sparsity Level','Fontsize',12)
ylabel('Avg Prob of False Alarm','Fontsize',12)
title('\it{Average Probability of False Alarm OMP}','Fontsize',12)

subplot(3,2,3)
plot(Sparsity_Levels,OMP.AvgRelErr(:,1),'-k+',Sparsity_Levels, OMP.AvgRelErr(:,2),'-bo',Sparsity_Levels, OMP.AvgRelErr(:,3),'-rd')
%axis([0 Sparsity_Levels(end)]);
xlabel('Sparsity Level','Fontsize',12)
ylabel('Avg Relative Error','Fontsize',12)
title('\it{Average Relative Error with Thresholding}','Fontsize',12)

subplot(3,2,4)
plot(Sparsity_Levels,OMP.AvgRelErrNT,'-k+')
%axis([0 Sparsity_Levels(end)]);
xlabel('Sparsity Level','Fontsize',12)
ylabel('Avg Relative Error','Fontsize',12)
title('\it{Average Relative Error without Thresholding}','Fontsize',12)

subplot(3,2,5)
plot(Sparsity_Levels,OMP.AvgNbrItr,'-k+')
%axis([0 Sparsity_Levels(end)]);
xlabel('Sparsity Level','Fontsize',12)
ylabel('Avg Number of Iterations','Fontsize',12)
title('\it{Average Number of Iterations per Sparsity Level}','Fontsize',12)

subplot(3,2,6)
plot(Sparsity_Levels,OMP.AvgTime,'-k+')
%axis([0 Sparsity_Levels(end)]);
xlabel('Sparsity Level','Fontsize',12)
ylabel('Average Recovery Time (seconds)','Fontsize',12)
title('\it{Average Recovery Time}','Fontsize',12)

figure(3)

subplot(3,2,1)
plot(Sparsity_Levels, AISS.AvgProbD(:,1),'-k+',Sparsity_Levels,AISS.AvgProbD(:,2),'-bo',Sparsity_Levels, AISS.AvgProbD(:,3),'-rd')
%axis([0 Sparsity_Levels(end)]);
xlabel('Sparsity Level','Fontsize',12)
ylabel('Prob of True Detection','Fontsize',12)
title('\it{Average Probability of True Detection AISS}','Fontsize',12)

subplot(3,2,2)
plot(Sparsity_Levels,AISS.AvgProbFA(:,1),'-k+',Sparsity_Levels, AISS.AvgProbFA(:,2),'-bo',Sparsity_Levels, AISS.AvgProbFA(:,3),'-rd')
%axis([0 Sparsity_Levels(end)]);
xlabel('Sparsity Level','Fontsize',12)
ylabel('Avg Prob of False Alarm','Fontsize',12)
title('\it{Average Probability of False Alarm AISS}','Fontsize',12)

subplot(3,2,3)
plot(Sparsity_Levels,AISS.AvgRelErr(:,1),'-k+',Sparsity_Levels, AISS.AvgRelErr(:,2),'-bo',Sparsity_Levels, AISS.AvgRelErr(:,3),'-rd')
%axis([0 Sparsity_Levels(end)]);
xlabel('Sparsity Level','Fontsize',12)
ylabel('Avg Relative Error','Fontsize',12)
title('\it{Average Relative Error with Thresholding}','Fontsize',12)

subplot(3,2,4)
plot(Sparsity_Levels,AISS.AvgRelErrNT,'-k+')
%axis([0 Sparsity_Levels(end)]);
xlabel('Sparsity Level','Fontsize',12)
ylabel('Avg Relative Error','Fontsize',12)
title('\it{Average Relative Error without Thresholding}','Fontsize',12)

subplot(3,2,5)
plot(Sparsity_Levels,AISS.AvgNbrItr,'-k+')
%axis([0 Sparsity_Levels(end)]);
xlabel('Sparsity Level','Fontsize',12)
ylabel('Avg Number of Iterations','Fontsize',12)
title('\it{Average Number of Iterations per Sparsity Level}','Fontsize',12)

subplot(3,2,6)
plot(Sparsity_Levels,AISS.AvgTime,'-k+')
%axis([0 Sparsity_Levels(end)]);
xlabel('Sparsity Level','Fontsize',12)
ylabel('Average Recovery Time (seconds)','Fontsize',12)
title('\it{Average Recovery Time}','Fontsize',12)


figure(4)
subplot(3,2,1)
plot(Sparsity_Levels, L1SQNN.AvgProbD(:,1),'-k+',Sparsity_Levels,L1SQNN.AvgProbD(:,2),'-bo',Sparsity_Levels, L1SQNN.AvgProbD(:,3),'-rd')
%axis([0 Sparsity_Levels(end)]);
xlabel('Sparsity Level','Fontsize',12)
ylabel('Prob of True Detection','Fontsize',12)
title('\it{Average Probability of True Detection L1SQNN}','Fontsize',12)

subplot(3,2,2)
plot(Sparsity_Levels,L1SQNN.AvgProbFA(:,1),'-k+',Sparsity_Levels, L1SQNN.AvgProbFA(:,2),'-bo',Sparsity_Levels, L1SQNN.AvgProbFA(:,3),'-rd')
%axis([0 Sparsity_Levels(end)]);
xlabel('Sparsity Level','Fontsize',12)
ylabel('Avg Prob of False Alarm','Fontsize',12)
title('\it{Average Probability of False Alarm L1SQNN}','Fontsize',12)

subplot(3,2,3)
plot(Sparsity_Levels,L1SQNN.AvgRelErr(:,1),'-k+',Sparsity_Levels, L1SQNN.AvgRelErr(:,2),'-bo',Sparsity_Levels, L1SQNN.AvgRelErr(:,3),'-rd')
%axis([0 Sparsity_Levels(end)]);
xlabel('Sparsity Level','Fontsize',12)
ylabel('Avg Relative Error','Fontsize',12)
title('\it{Average Relative Error with Thresholding}','Fontsize',12)

subplot(3,2,4)
plot(Sparsity_Levels,L1SQNN.AvgRelErrNT,'-k+')
%axis([0 Sparsity_Levels(end)]);
xlabel('Sparsity Level','Fontsize',12)
ylabel('Avg Relative Error','Fontsize',12)
title('\it{Average Relative Error without Thresholding}','Fontsize',12)

subplot(3,2,5)
plot(Sparsity_Levels,L1SQNN.AvgNbrItr,'-k+')
%axis([0 Sparsity_Levels(end)]);
xlabel('Sparsity Level','Fontsize',12)
ylabel('Avg Number of Iterations','Fontsize',12)
title('\it{Average Number of Iterations per Sparsity Level}','Fontsize',12)

subplot(3,2,6)
plot(Sparsity_Levels,L1SQNN.AvgTime,'-k+')
%axis([0 Sparsity_Levels(end)]);
xlabel('Sparsity Level','Fontsize',12)
ylabel('Average Recovery Time (seconds)','Fontsize',12)
title('\it{Average Recovery Time}','Fontsize',12)

figure(5)
subplot(3,2,1)
plot(Sparsity_Levels, L1L2CNN.AvgProbD(:,1),'-k+',Sparsity_Levels,L1L2CNN.AvgProbD(:,2),'-bo',Sparsity_Levels, L1L2CNN.AvgProbD(:,3),'-rd')
%axis([0 Sparsity_Levels(end)]);
xlabel('Sparsity Level','Fontsize',12)
ylabel('Prob of True Detection','Fontsize',12)
title('\it{Average Probability of True Detection L1L2CNN}','Fontsize',12)

subplot(3,2,2)
plot(Sparsity_Levels,L1L2CNN.AvgProbFA(:,1),'-k+',Sparsity_Levels, L1L2CNN.AvgProbFA(:,2),'-bo',Sparsity_Levels, L1L2CNN.AvgProbFA(:,3),'-rd')
%axis([0 Sparsity_Levels(end)]);
xlabel('Sparsity Level','Fontsize',12)
ylabel('Avg Prob of False Alarm','Fontsize',12)
title('\it{Average Probability of False Alarm L1L2CNN}','Fontsize',12)

subplot(3,2,3)
plot(Sparsity_Levels,L1L2CNN.AvgRelErr(:,1),'-k+',Sparsity_Levels, L1L2CNN.AvgRelErr(:,2),'-bo',Sparsity_Levels, L1L2CNN.AvgRelErr(:,3),'-rd')
%axis([0 Sparsity_Levels(end)]);
xlabel('Sparsity Level','Fontsize',12)
ylabel('Avg Relative Error','Fontsize',12)
title('\it{Average Relative Error with Thresholding}','Fontsize',12)

subplot(3,2,4)
plot(Sparsity_Levels,L1L2CNN.AvgRelErrNT,'-k+')
%axis([0 Sparsity_Levels(end)]);
xlabel('Sparsity Level','Fontsize',12)
ylabel('Avg Relative Error','Fontsize',12)
title('\it{Average Relative Error without Thresholding}','Fontsize',12)

subplot(3,2,5)
plot(Sparsity_Levels,L1L2CNN.AvgNbrItr,'-k+')
%axis([0 Sparsity_Levels(end)]);
xlabel('Sparsity Level','Fontsize',12)
ylabel('Avg Number of Iterations','Fontsize',12)
title('\it{Average Number of Iterations per Sparsity Level}','Fontsize',12)

subplot(3,2,6)
plot(Sparsity_Levels,L1L2CNN.AvgTime,'-k+')
%axis([0 Sparsity_Levels(end)]);
xlabel('Sparsity Level','Fontsize',12)
ylabel('Average Recovery Time (seconds)','Fontsize',12)
title('\it{Average Recovery Time}','Fontsize',12)
