# Supplementary material for: Compressed Sensing in On-Grid MIMO Radar
Source: ScientificWorldJournal. 2015 Sep 30;2015:397878. doi: 10.1155/2015/397878 (PMC4870333; doi:10.1155/2015/397878)
Supplement: Supplementary file 1 — The Supplementary Material accompanying this paper is a TAR file containing the MATLAB files needed to reproduce the results of the paper. These include the exact code used in each experiment, the resulting data sets from each experiment, and the code to generate the plots for each of these data sets. [file 397878.f1.tar › MFM_Radar_Reproducibles-2015-08-21/MFM_Radar_Reproducibles/Data and Plots/Experiment 3 Data and Plots/Experiment_3_Plots.m]

%% Plot ROC Together SNR = 15 dB, s= 2,4,6,8,10,12,15
figure(100)
plot(L1SQNNR.AvgProbFA(2,2:15,3),L1SQNNR.AvgProbD(2,2:15,3),'-k.',...
     L1SQNNR.AvgProbFA(5,2:15,3),L1SQNNR.AvgProbD(5,2:15,3),'-b*',...
     L1SQNNR.AvgProbFA(8,2:15,3),L1SQNNR.AvgProbD(8,2:15,3),'-ro',...
     L1SQNNR.AvgProbFA(10,2:15,3),L1SQNNR.AvgProbD(10,2:15,3),'-gd',...
     L1SQNNR.AvgProbFA(12,2:15,3),L1SQNNR.AvgProbD(12,2:15,3),'-mx',...
     L1SQNNR.AvgProbFA(15,2:15,3),L1SQNNR.AvgProbD(15,2:15,3),'-c+')
%axis([0 Sparsity_Levels(end)]);
xlabel('Probability of False Alarm','Fontsize',12)
ylabel('Probability of Detection','Fontsize',12)
title('ROC curves for L1SQNN with Random Arrays, SNR = 15 dB','Fontsize',12)
legend('s = 2','s = 5', 's = 8','s = 10', 's = 12', 's = 15' ,'Location','Best')
%set(gca,'XTick',1:15)
grid;

%% Plot Several Together
% Plot SNR = Inf, 30, 15 dB, Sparsity = 5, 10, 15
figure(102)

plot(L1SQNNR.AvgProbFA(5,2:15,1),L1SQNNR.AvgProbD(5,2:15,1),'-k.',...
    L1SQNNR.AvgProbFA(5,2:15,2),L1SQNNR.AvgProbD(5,2:15,2),'-k*',...
    L1SQNNR.AvgProbFA(5,2:15,3),L1SQNNR.AvgProbD(5,2:15,3),'-kx',...
     L1SQNNR.AvgProbFA(10,2:15,1),L1SQNNR.AvgProbD(10,2:15,1),'-b.',...
     L1SQNNR.AvgProbFA(10,2:15,2),L1SQNNR.AvgProbD(10,2:15,2),'-b*',...
     L1SQNNR.AvgProbFA(10,2:15,3),L1SQNNR.AvgProbD(10,2:15,3),'-bx',...
     L1SQNNR.AvgProbFA(15,2:15,1),L1SQNNR.AvgProbD(15,2:15,1),'-r.',...
     L1SQNNR.AvgProbFA(15,2:15,2),L1SQNNR.AvgProbD(15,2:15,2),'-r*',...
     L1SQNNR.AvgProbFA(15,2:15,3),L1SQNNR.AvgProbD(15,2:15,3),'-rx')
%axis([0 Sparsity_Levels(end)]);
xlabel('Probability of False Alarm')
ylabel('Probability of Detection')
title({'ROC curves for L1SQNN with Random Array'})
legend('s = 5, No Noise', 's = 5, SNR = 30 dB','s = 5, SNR = 15 dB', 's = 10, No Noise', 's = 10, SNR = 30 dB','s = 10, SNR = 15 dB', 's = 15, No Noise', 's = 15, SNR = 30 dB','s = 15, SNR = 15 dB','Location','Best')
%set(gca,'XTick',1:15)
grid;

%% Plot ROC Together SNR = 15 dB, s= 3,6,9,12,15
figure(99)
plot(L1SQNNR.AvgProbFA(3,2:15,3),L1SQNNR.AvgProbD(3,2:15,3),'-k.',...
     L1SQNNR.AvgProbFA(6,2:15,3),L1SQNNR.AvgProbD(6,2:15,3),'-b*',...
     L1SQNNR.AvgProbFA(9,2:15,3),L1SQNNR.AvgProbD(9,2:15,3),'-ro',...
     L1SQNNR.AvgProbFA(12,2:15,3),L1SQNNR.AvgProbD(12,2:15,3),'-gd',...
     L1SQNNR.AvgProbFA(15,2:15,3),L1SQNNR.AvgProbD(15,2:15,3),'-mx')
%axis([0 Sparsity_Levels(end)]);
xlabel('Probability of False Alarm','Fontsize',12)
ylabel('Probability of Detection','Fontsize',12)
title('ROC curves for L1SQNN with Random Arrays, SNR = 15 dB','Fontsize',12)
legend('s = 3','s = 6', 's = 9','s = 12', 's = 15','Location','Best')
%set(gca,'XTick',1:15)
grid;

%% ROC Curves based on Data
% Sparsity 5, 10 and 15

figure(100)

subplot(2,2,1)
plot(L1SQNNR.AvgProbFA(5,2:15,1),L1SQNNR.AvgProbD(5,2:15,1),'-kx',...
     L1SQNNR.AvgProbFA(10,2:15,1),L1SQNNR.AvgProbD(10,2:15,1),'-ko',...
     L1SQNNR.AvgProbFA(15,2:15,1),L1SQNNR.AvgProbD(15,2:15,1),'-kd')
%axis([0 Sparsity_Levels(end)]);
xlabel('Avg Prob of False Alarm','Fontsize',12)
ylabel('Avg Prob of True Detection','Fontsize',12)
title({'\it{ROC for L1SQNN, Random Array,}';'\it{No Noise, \lambda = 24, Sparsity = 5, 10, 15}'})
%legend('t = .1', 't = .5','t = .8', 't = .9','t = .99','t = .999','Location','Best')
%set(gca,'XTick',1:15)
grid;

subplot(2,2,2)
plot(L1SQNNR.AvgProbFA(5,2:15,2),L1SQNNR.AvgProbD(5,2:15,2),'-kx',...
     L1SQNNR.AvgProbFA(10,2:15,2),L1SQNNR.AvgProbD(10,2:15,2),'-ko',...
     L1SQNNR.AvgProbFA(15,2:15,2),L1SQNNR.AvgProbD(15,2:15,2),'-kd')
%axis([0 Sparsity_Levels(end)]);
xlabel('Avg Prob of False Alarm','Fontsize',12)
ylabel('Avg Prob of True Detection','Fontsize',12)
title({'\it{ROC for L1SQNN, Random Array,}';'\it{SNR = 30 dB, \lambda = 15, Sparsity = 5, 10, 15}'})
%legend('t = .1', 't = .5','t = .8', 't = .9','t = .99','t = .999','Location','Best')
%set(gca,'XTick',1:15)
grid;

subplot(2,2,3)

plot(L1SQNNR.AvgProbFA(5,2:15,3),L1SQNNR.AvgProbD(5,2:15,3),'-kx',...
     L1SQNNR.AvgProbFA(10,2:15,3),L1SQNNR.AvgProbD(10,2:15,3),'-ko',...
     L1SQNNR.AvgProbFA(15,2:15,3),L1SQNNR.AvgProbD(15,2:15,3),'-kd')
%axis([0 Sparsity_Levels(end)]);
xlabel('Avg Prob of False Alarm','Fontsize',12)
ylabel('Avg Prob of True Detection','Fontsize',12)
title({'\it{ROC for L1SQNN, Random Array,}';'\it{SNR = 15 dB, \lambda = 5, Sparsity = 5, 10, 15}'})
%legend('t = .1', 't = .5','t = .8', 't = .9','t = .99','t = .999','Location','Best')
%set(gca,'XTick',1:15)
grid;

%%
% Sparsity 3,6 and 9

figure(101)

subplot(2,2,1)
plot(L1SQNNR.AvgProbFA(3,2:15,1),L1SQNNR.AvgProbD(3,2:15,1),'-kx',...
     L1SQNNR.AvgProbFA(6,2:15,1),L1SQNNR.AvgProbD(6,2:15,1),'-ko',...
     L1SQNNR.AvgProbFA(9,2:15,1),L1SQNNR.AvgProbD(9,2:15,1),'-kd')
%axis([0 Sparsity_Levels(end)]);
xlabel('Avg Prob of False Alarm','Fontsize',12)
ylabel('Avg Prob of True Detection','Fontsize',12)
title({'\it{ROC for L1SQNN, Random Array,}';'\it{No Noise, \lambda = 24, Sparsity = 3, 6, 9}'})
%legend('t = .1', 't = .5','t = .8', 't = .9','t = .99','t = .999','Location','Best')
%set(gca,'XTick',1:15)
grid;

subplot(2,2,2)
plot(L1SQNNR.AvgProbFA(3,2:15,2),L1SQNNR.AvgProbD(3,2:15,2),'-kx',...
     L1SQNNR.AvgProbFA(6,2:15,2),L1SQNNR.AvgProbD(6,2:15,2),'-ko',...
     L1SQNNR.AvgProbFA(9,2:15,2),L1SQNNR.AvgProbD(9,2:15,2),'-kd')
%axis([0 Sparsity_Levels(end)]);
xlabel('Avg Prob of False Alarm','Fontsize',12)
ylabel('Avg Prob of True Detection','Fontsize',12)
title({'\it{ROC for L1SQNN, Random Array,}';'\it{SNR = 30 dB, \lambda = 15, Sparsity = 3, 6, 9}'})
%legend('t = .1', 't = .5','t = .8', 't = .9','t = .99','t = .999','Location','Best')
%set(gca,'XTick',1:15)
grid;

subplot(2,2,3)
plot(L1SQNNR.AvgProbFA(3,2:15,3),L1SQNNR.AvgProbD(3,2:15,3),'-kx',...
     L1SQNNR.AvgProbFA(6,2:15,3),L1SQNNR.AvgProbD(6,2:15,3),'-ko',...
     L1SQNNR.AvgProbFA(9,2:15,3),L1SQNNR.AvgProbD(9,2:15,3),'-kd')
%axis([0 Sparsity_Levels(end)]);
xlabel('Avg Prob of False Alarm','Fontsize',12)
ylabel('Avg Prob of True Detection','Fontsize',12)
title({'\it{ROC for L1SQNN, Random Array,}';'\it{SNR = 15 dB, \lambda = 5, Sparsity = 3, 6, 9}'})
%legend('t = .1', 't = .5','t = .8', 't = .9','t = .99','t = .999','Location','Best')
%set(gca,'XTick',1:15)
grid;


%% Plot Together SNR = 30, s=3,6,9,12,15

figure(103)
plot(L1SQNNR.AvgProbFA(3,2:15,2),L1SQNNR.AvgProbD(3,2:15,2),'-k.',...
     L1SQNNR.AvgProbFA(6,2:15,2),L1SQNNR.AvgProbD(6,2:15,2),'-b*',...
     L1SQNNR.AvgProbFA(9,2:15,2),L1SQNNR.AvgProbD(9,2:15,2),'-ro',...
     L1SQNNR.AvgProbFA(12,2:15,2),L1SQNNR.AvgProbD(12,2:15,2),'-g.',...
     L1SQNNR.AvgProbFA(15,2:15,2),L1SQNNR.AvgProbD(15,2:15,2),'-m*')
%axis([0 Sparsity_Levels(end)]);
xlabel('Probability of False Alarm')
ylabel('Probability of Detection')
title({'\it{L1SQNN with Random Array, SNR = 30 dB}'})
legend('s = 3','s = 6', 's = 9','s = 12', 's = 15','Location','Best')
%set(gca,'XTick',1:15)
grid;

%% Plot L1SQNNR data for each threshold for SNR = Inf, SNR = 30dB, SNR = 15dB

% First SNR =Inf

figure(104)

subplot(2,2,1)
plot(Sparsity_Levels(1:15),L1SQNNR.AvgProbD(1:15,2,1),'-kx',...
    Sparsity_Levels(1:15),L1SQNNR.AvgProbD(1:15,4,1),'-bo',...
    Sparsity_Levels(1:15),L1SQNNR.AvgProbD(1:15,5,1),'-rd',...
    Sparsity_Levels(1:15),L1SQNNR.AvgProbD(1:15,7,1),'-gs',...
    Sparsity_Levels(1:15),L1SQNNR.AvgProbD(1:15,8,1),'-m^',...
    Sparsity_Levels(1:15),L1SQNNR.AvgProbD(1:15,9,1),'-yh',...
    Sparsity_Levels(1:15),L1SQNNR.AvgProbD(1:15,10,1),'-cp')
%axis([0 Sparsity_Levels(1:15)(end)]);
xlabel('Sparsity Level','Fontsize',12)
ylabel('Avg Prob of True Detection','Fontsize',12)
title({'\it{Avg Prob of True Detection with L1SQNN}';'\it{Random Array, No Noise, \lambda = 24}'})
legend('t = 0.001','t = 0.1', 't = 0.5','t = 0.8', 't = 0.9','t = 0.99','t = 0.999','Location','Best')
set(gca,'XTick',1:15)
grid;

subplot(2,2,2)
plot(Sparsity_Levels(1:15),L1SQNNR.AvgProbFA(1:15,2,1),'-kx',...
    Sparsity_Levels(1:15),L1SQNNR.AvgProbFA(1:15,4,1),'-bo',...
    Sparsity_Levels(1:15),L1SQNNR.AvgProbFA(1:15,5,1),'-rd',...
    Sparsity_Levels(1:15),L1SQNNR.AvgProbFA(1:15,7,1),'-gs',...
    Sparsity_Levels(1:15),L1SQNNR.AvgProbFA(1:15,8,1),'-m^',...
    Sparsity_Levels(1:15),L1SQNNR.AvgProbFA(1:15,9,1),'-yh',...
    Sparsity_Levels(1:15),L1SQNNR.AvgProbFA(1:15,10,1),'-cp')
%axis([0 Sparsity_Levels(1:15)(end)]);
xlabel('Sparsity Level','Fontsize',12)
ylabel('Avg Prob of False Alarm','Fontsize',12)
title({'\it{Avg Prob of False Alarm with L1SQNN}';'\it{Random Array, No Noise, \lambda = 24}'})
legend('t = 0.001','t = 0.1', 't = 0.5','t = 0.8', 't = 0.9','t = 0.99','t = 0.999','Location','Best')
set(gca,'XTick',1:15)
grid;

subplot(2,2,3)
plot(Sparsity_Levels(1:15),L1SQNNR.AvgRelErr(1:15,2,1),'-kx',...
    Sparsity_Levels(1:15),L1SQNNR.AvgRelErr(1:15,4,1),'-bo',...
    Sparsity_Levels(1:15),L1SQNNR.AvgRelErr(1:15,5,1),'-rd',...
    Sparsity_Levels(1:15),L1SQNNR.AvgRelErr(1:15,7,1),'-gs',...
    Sparsity_Levels(1:15),L1SQNNR.AvgRelErr(1:15,8,1),'-m^',...
    Sparsity_Levels(1:15),L1SQNNR.AvgRelErr(1:15,9,1),'-yh',...
    Sparsity_Levels(1:15),L1SQNNR.AvgRelErr(1:15,10,1),'-cp')
%axis([0 Sparsity_Levels(1:15)(end)]);
xlabel('Sparsity Level','Fontsize',12)
ylabel('Avg Relative Error','Fontsize',12)
title({'\it{Avg Relative Error after Thresholding with L1SQNN}';'\it{Random Array, No Noise, \lambda = 24}'})
legend('t = 0.001','t = 0.1', 't = 0.5','t = 0.8', 't = 0.9','t = 0.99','t = 0.999','Location','Best')
set(gca,'XTick',1:15)
grid;

subplot(2,2,4)
plot(Sparsity_Levels(1:15),L1SQNNR.AvgRelErrS(1:15,2,1),'-kx',...
    Sparsity_Levels(1:15),L1SQNNR.AvgRelErrS(1:15,4,1),'-bo',...
    Sparsity_Levels(1:15),L1SQNNR.AvgRelErrS(1:15,5,1),'-rd',...
    Sparsity_Levels(1:15),L1SQNNR.AvgRelErrS(1:15,7,1),'-gs',...
    Sparsity_Levels(1:15),L1SQNNR.AvgRelErrS(1:15,8,1),'-m^',...
    Sparsity_Levels(1:15),L1SQNNR.AvgRelErrS(1:15,9,1),'-yh',...
    Sparsity_Levels(1:15),L1SQNNR.AvgRelErrS(1:15,10,1),'-cp')
%axis([0 Sparsity_Levels(1:15)(end)]);
xlabel('Sparsity Level','Fontsize',12)
ylabel('Avg Relative Error on True Support','Fontsize',12)
title({'\it{Avg Relative Error on True Support after Thresholding with L1SQNN}';'\it{Random Array, No Noise, \lambda = 24}'})
legend('t = 0.001','t = 0.1', 't = 0.5','t = 0.8', 't = 0.9','t = 0.99','t = 0.999','Location','Best')
set(gca,'XTick',1:15)
grid;

%%
% SNR = 30dB

figure(105)

subplot(2,2,1)
plot(Sparsity_Levels(1:15),L1SQNNR.AvgProbD(1:15,2,2),'-kx',...
    Sparsity_Levels(1:15),L1SQNNR.AvgProbD(1:15,4,2),'-bo',...
    Sparsity_Levels(1:15),L1SQNNR.AvgProbD(1:15,5,2),'-rd',...
    Sparsity_Levels(1:15),L1SQNNR.AvgProbD(1:15,7,2),'-gs',...
    Sparsity_Levels(1:15),L1SQNNR.AvgProbD(1:15,8,2),'-m^',...
    Sparsity_Levels(1:15),L1SQNNR.AvgProbD(1:15,9,2),'-yh',...
    Sparsity_Levels(1:15),L1SQNNR.AvgProbD(1:15,10,2),'-cp')
%axis([0 Sparsity_Levels(1:15)(end)]);
xlabel('Sparsity Level','Fontsize',12)
ylabel('Avg Prob of True Detection','Fontsize',12)
title({'\it{Avg Prob of True Detection with L1SQNN}';'\it{Random Array, SNR = 30 dB, \lambda = 12}'})
legend('t = 0.001','t = 0.1', 't = 0.5','t = 0.8', 't = 0.9','t = 0.99','t = 0.999','Location','Best')
set(gca,'XTick',1:15)
grid;

subplot(2,2,2)
plot(Sparsity_Levels(1:15),L1SQNNR.AvgProbFA(1:15,2,2),'-kx',...
    Sparsity_Levels(1:15),L1SQNNR.AvgProbFA(1:15,4,2),'-bo',...
    Sparsity_Levels(1:15),L1SQNNR.AvgProbFA(1:15,5,2),'-rd',...
    Sparsity_Levels(1:15),L1SQNNR.AvgProbFA(1:15,7,2),'-gs',...
    Sparsity_Levels(1:15),L1SQNNR.AvgProbFA(1:15,8,2),'-m^',...
    Sparsity_Levels(1:15),L1SQNNR.AvgProbFA(1:15,9,2),'-yh',...
    Sparsity_Levels(1:15),L1SQNNR.AvgProbFA(1:15,10,2),'-cp')
%axis([0 Sparsity_Levels(1:15)(end)]);
xlabel('Sparsity Level','Fontsize',12)
ylabel('Avg Prob of False Alarm','Fontsize',12)
title({'\it{Avg Prob of False Alarm with L1SQNN}';'\it{Random Array, SNR = 30 dB, \lambda = 12}'})
legend('t = 0.001','t = 0.1', 't = 0.5','t = 0.8', 't = 0.9','t = 0.99','t = 0.999','Location','Best')
set(gca,'XTick',1:15)
grid;

subplot(2,2,3)
plot(Sparsity_Levels(1:15),L1SQNNR.AvgRelErr(1:15,2,2),'-kx',...
    Sparsity_Levels(1:15),L1SQNNR.AvgRelErr(1:15,4,2),'-bo',...
    Sparsity_Levels(1:15),L1SQNNR.AvgRelErr(1:15,5,2),'-rd',...
    Sparsity_Levels(1:15),L1SQNNR.AvgRelErr(1:15,7,2),'-gs',...
    Sparsity_Levels(1:15),L1SQNNR.AvgRelErr(1:15,8,2),'-m^',...
    Sparsity_Levels(1:15),L1SQNNR.AvgRelErr(1:15,9,2),'-yh',...
    Sparsity_Levels(1:15),L1SQNNR.AvgRelErr(1:15,10,2),'-cp')
%axis([0 Sparsity_Levels(1:15)(end)]);
xlabel('Sparsity Level','Fontsize',12)
ylabel('Avg Relative Error','Fontsize',12)
title({'\it{Avg Relative Error after Thresholding with L1SQNN}';'\it{Random Array, SNR = 30 dB, \lambda = 12}'})
legend('t = 0.001','t = 0.1', 't = 0.5','t = 0.8', 't = 0.9','t = 0.99','t = 0.999','Location','Best')
set(gca,'XTick',1:15)
grid;

subplot(2,2,4)
plot(Sparsity_Levels(1:15),L1SQNNR.AvgRelErrS(1:15,2,2),'-kx',...
    Sparsity_Levels(1:15),L1SQNNR.AvgRelErrS(1:15,4,2),'-bo',...
    Sparsity_Levels(1:15),L1SQNNR.AvgRelErrS(1:15,5,2),'-rd',...
    Sparsity_Levels(1:15),L1SQNNR.AvgRelErrS(1:15,7,2),'-gs',...
    Sparsity_Levels(1:15),L1SQNNR.AvgRelErrS(1:15,8,2),'-m^',...
    Sparsity_Levels(1:15),L1SQNNR.AvgRelErrS(1:15,9,2),'-yh',...
    Sparsity_Levels(1:15),L1SQNNR.AvgRelErrS(1:15,10,2),'-cp')
%axis([0 Sparsity_Levels(1:15)(end)]);
xlabel('Sparsity Level','Fontsize',12)
ylabel('Avg Relative Error on True Support','Fontsize',12)
title({'\it{Avg Relative Error on True Support after Thresholding with L1SQNN}';'\it{Random Array, SNR = 30 dB, \lambda = 12}'})
legend('t = 0.001','t = 0.1', 't = 0.5','t = 0.8', 't = 0.9','t = 0.99','t = 0.999','Location','Best')
set(gca,'XTick',1:15)
grid;

%%
% SNR = 15dB

figure(106)

subplot(2,2,1)
plot(Sparsity_Levels(1:15),L1SQNNR.AvgProbD(1:15,2,3),'-kx',...
    Sparsity_Levels(1:15),L1SQNNR.AvgProbD(1:15,4,3),'-bo',...
    Sparsity_Levels(1:15),L1SQNNR.AvgProbD(1:15,5,3),'-rd',...
    Sparsity_Levels(1:15),L1SQNNR.AvgProbD(1:15,7,3),'-gs',...
    Sparsity_Levels(1:15),L1SQNNR.AvgProbD(1:15,8,3),'-m^',...
    Sparsity_Levels(1:15),L1SQNNR.AvgProbD(1:15,9,3),'-yh',...
    Sparsity_Levels(1:15),L1SQNNR.AvgProbD(1:15,10,3),'-cp')
%axis([0 Sparsity_Levels(1:15)(end)]);
xlabel('Sparsity Level','Fontsize',12)
ylabel('Avg Prob of True Detection','Fontsize',12)
title({'\it{Avg Prob of True Detection with L1SQNN}';'\it{Random Array, SNR = 15 dB, \lambda = 5}'})
legend('t = 0.001','t = 0.1', 't = 0.5','t = 0.8', 't = 0.9','t = 0.99','t = 0.999','Location','Best')
set(gca,'XTick',1:15)
grid;

subplot(2,2,2)
plot(Sparsity_Levels(1:15),L1SQNNR.AvgProbFA(1:15,2,3),'-kx',...
    Sparsity_Levels(1:15),L1SQNNR.AvgProbFA(1:15,4,3),'-bo',...
    Sparsity_Levels(1:15),L1SQNNR.AvgProbFA(1:15,5,3),'-rd',...
    Sparsity_Levels(1:15),L1SQNNR.AvgProbFA(1:15,7,3),'-gs',...
    Sparsity_Levels(1:15),L1SQNNR.AvgProbFA(1:15,8,3),'-m^',...
    Sparsity_Levels(1:15),L1SQNNR.AvgProbFA(1:15,9,3),'-yh',...
    Sparsity_Levels(1:15),L1SQNNR.AvgProbFA(1:15,10,3),'-cp')
%axis([0 Sparsity_Levels(1:15)(end)]);
xlabel('Sparsity Level','Fontsize',12)
ylabel('Avg Prob of False Alarm','Fontsize',12)
title({'\it{Avg Prob of False Alarm with L1SQNN}';'\it{Random Array, SNR = 15 dB, \lambda = 5}'})
legend('t = 0.001','t = 0.1', 't = 0.5','t = 0.8', 't = 0.9','t = 0.99','t = 0.999','Location','Best')
set(gca,'XTick',1:15)
grid;

subplot(2,2,3)
plot(Sparsity_Levels(1:15),L1SQNNR.AvgRelErr(1:15,2,3),'-kx',...
    Sparsity_Levels(1:15),L1SQNNR.AvgRelErr(1:15,4,3),'-bo',...
    Sparsity_Levels(1:15),L1SQNNR.AvgRelErr(1:15,5,3),'-rd',...
    Sparsity_Levels(1:15),L1SQNNR.AvgRelErr(1:15,7,3),'-gs',...
    Sparsity_Levels(1:15),L1SQNNR.AvgRelErr(1:15,8,3),'-m^',...
    Sparsity_Levels(1:15),L1SQNNR.AvgRelErr(1:15,9,3),'-yh',...
    Sparsity_Levels(1:15),L1SQNNR.AvgRelErr(1:15,10,3),'-cp')
%axis([0 Sparsity_Levels(1:15)(end)]);
xlabel('Sparsity Level','Fontsize',12)
ylabel('Avg Relative Error','Fontsize',12)
title({'\it{Avg Relative Error after Thresholding with L1SQNN}';'\it{Random Array, SNR = 15 dB, \lambda = 5}'})
legend('t = 0.001','t = 0.1', 't = 0.5','t = 0.8', 't = 0.9','t = 0.99','t = 0.999','Location','Best')
set(gca,'XTick',1:15)
grid;

subplot(2,2,4)
plot(Sparsity_Levels(1:15),L1SQNNR.AvgRelErrS(1:15,2,3),'-kx',...
    Sparsity_Levels(1:15),L1SQNNR.AvgRelErrS(1:15,4,3),'-bo',...
    Sparsity_Levels(1:15),L1SQNNR.AvgRelErrS(1:15,5,3),'-rd',...
    Sparsity_Levels(1:15),L1SQNNR.AvgRelErrS(1:15,7,3),'-gs',...
    Sparsity_Levels(1:15),L1SQNNR.AvgRelErrS(1:15,8,3),'-m^',...
    Sparsity_Levels(1:15),L1SQNNR.AvgRelErrS(1:15,9,3),'-yh',...
    Sparsity_Levels(1:15),L1SQNNR.AvgRelErrS(1:15,10,3),'-cp')
%axis([0 Sparsity_Levels(1:15)(end)]);
xlabel('Sparsity Level','Fontsize',12)
ylabel('Avg Relative Error on True Support','Fontsize',12)
title({'\it{Avg Relative Error on True Support after Thresholding with L1SQNN}';'\it{Random Array, SNR = 15 dB, \lambda = 5}'})
legend('t = 0.001','t = 0.1', 't = 0.5','t = 0.8', 't = 0.9','t = 0.99','t = 0.999','Location','Best')
set(gca,'XTick',1:15)
grid;
