# Supplementary material for: Compressed Sensing in On-Grid MIMO Radar
Source: ScientificWorldJournal. 2015 Sep 30;2015:397878. doi: 10.1155/2015/397878 (PMC4870333; doi:10.1155/2015/397878)
Supplement: Supplementary file 1 — The Supplementary Material accompanying this paper is a TAR file containing the MATLAB files needed to reproduce the results of the paper. These include the exact code used in each experiment, the resulting data sets from each experiment, and the code to generate the plots for each of these data sets. [file 397878.f1.tar › MFM_Radar_Reproducibles-2015-08-21/MFM_Radar_Reproducibles/Data and Plots/Experiment 4 Data and Plots/Experiment_4_Plots.m]

%%
% SNR = Inf, 50, 25 and 15 dB
% Thresholds threshold=[0.0,0.0001,0.001,0.01,0.1,0.2,0.3,0.4,0.5,0.6,0.7,.8,0.9,.99,.999]; 
% First Plot ROC curves, then Number of Iteration Curves
% Load data for SNR=Inf, beta is [1.1, 1.3, 1.5, 1.7, 1.9]

clear all;
load('Experiment_4_Data_1.mat')
L1SQNNRINF=L1SQNNR;
load('Experiment_4_Data_2.mat')
L1SQNNR50=L1SQNNR;
load('Experiment_4_Data_3.mat')
L1SQNNR25=L1SQNNR;
load('Experiment_4_Data_4.mat')
L1SQNNR15=L1SQNNR;

%% Plot ROC Together  s=5,8,12
figure(401)
subplot(2,2,1)
plot(L1SQNNRINF.AvgProbFA(5,2:15,1),L1SQNNRINF.AvgProbD(5,2:15,1),'-k.',...
    L1SQNNRINF.AvgProbFA(5,2:15,2),L1SQNNRINF.AvgProbD(5,2:15,2),'-b.',...
    L1SQNNRINF.AvgProbFA(5,2:15,3),L1SQNNRINF.AvgProbD(5,2:15,3),'-r.',...
    L1SQNNRINF.AvgProbFA(5,2:15,4),L1SQNNRINF.AvgProbD(5,2:15,4),'-g.',...
    L1SQNNRINF.AvgProbFA(5,2:15,5),L1SQNNRINF.AvgProbD(5,2:15,5),'-m.',...
    L1SQNNRINF.AvgProbFA(8,2:15,1),L1SQNNRINF.AvgProbD(8,2:15,1),'-ko',...
    L1SQNNRINF.AvgProbFA(8,2:15,2),L1SQNNRINF.AvgProbD(8,2:15,2),'-bo',...
    L1SQNNRINF.AvgProbFA(8,2:15,3),L1SQNNRINF.AvgProbD(8,2:15,3),'-ro',...
    L1SQNNRINF.AvgProbFA(8,2:15,4),L1SQNNRINF.AvgProbD(8,2:15,4),'-go',...
    L1SQNNRINF.AvgProbFA(8,2:15,5),L1SQNNRINF.AvgProbD(8,2:15,5),'-mo',...
    L1SQNNRINF.AvgProbFA(12,2:15,1),L1SQNNRINF.AvgProbD(12,2:15,1),'-kp',...
    L1SQNNRINF.AvgProbFA(12,2:15,2),L1SQNNRINF.AvgProbD(12,2:15,2),'-bp',...
    L1SQNNRINF.AvgProbFA(12,2:15,3),L1SQNNRINF.AvgProbD(12,2:15,3),'-rp',...
    L1SQNNRINF.AvgProbFA(12,2:15,4),L1SQNNRINF.AvgProbD(12,2:15,4),'-gp',...
    L1SQNNRINF.AvgProbFA(12,2:15,5),L1SQNNRINF.AvgProbD(12,2:15,5),'-mp')
%axis([0 Sparsity_Levels(end)]);
xlabel('Probability of False Alarm','Fontsize',12)
ylabel('Probability of Detection','Fontsize',12)
title('ROC curves for L1SQNN with Random Arrays, No Noise','Fontsize',12)
legend('\beta = 10','\beta = 15', '\beta = 20','\beta = 25','\beta = 30','Location','Best')
%set(gca,'XTick',1:15)
grid;
line([.006, .01555],[.93, .468]);
line([0, .006],[.93, .46]);
rectangle('Position', [0, .93, .006, .05], ...
          'EdgeColor', [0.4, 0.1, 0.4]);
x_a = 0.208; y_a = 0.615; w_a = 0.13; h_a = 0.13;
ax = axes('Units', 'Normalized', ...
          'Position', [x_a, y_a, w_a, h_a], ...
          'XTick', [], ...
          'YTick', [], ...
          'Box', 'on', ...
          'LineWidth', 2, ...
          'Color', [0.95, 0.99, 0.95]);
hold on;
plot(L1SQNNRINF.AvgProbFA(5,2:15,1),L1SQNNRINF.AvgProbD(5,2:15,1),'-k.',...
    L1SQNNRINF.AvgProbFA(5,2:15,2),L1SQNNRINF.AvgProbD(5,2:15,2),'-b.',...
    L1SQNNRINF.AvgProbFA(5,2:15,3),L1SQNNRINF.AvgProbD(5,2:15,3),'-r.',...
    L1SQNNRINF.AvgProbFA(5,2:15,4),L1SQNNRINF.AvgProbD(5,2:15,4),'-g.',...
    L1SQNNRINF.AvgProbFA(5,2:15,5),L1SQNNRINF.AvgProbD(5,2:15,5),'-m.')
xlabel('Zoom for s = 5','Fontsize',12);
axis([0, .01, .93, .98]);
hold off


subplot(2,2,2)
plot(L1SQNNR50.AvgProbFA(5,2:15,1),L1SQNNR50.AvgProbD(5,2:15,1),'-k.',...
    L1SQNNR50.AvgProbFA(5,2:15,2),L1SQNNR50.AvgProbD(5,2:15,2),'-b.',...
    L1SQNNR50.AvgProbFA(5,2:15,3),L1SQNNR50.AvgProbD(5,2:15,3),'-r.',...
    L1SQNNR50.AvgProbFA(5,2:15,4),L1SQNNR50.AvgProbD(5,2:15,4),'-g.',...
    L1SQNNR50.AvgProbFA(5,2:15,5),L1SQNNR50.AvgProbD(5,2:15,5),'-m.',...
    L1SQNNR50.AvgProbFA(8,2:15,1),L1SQNNR50.AvgProbD(8,2:15,1),'-ko',...
    L1SQNNR50.AvgProbFA(8,2:15,2),L1SQNNR50.AvgProbD(8,2:15,2),'-bo',...
    L1SQNNR50.AvgProbFA(8,2:15,3),L1SQNNR50.AvgProbD(8,2:15,3),'-ro',...
    L1SQNNR50.AvgProbFA(8,2:15,4),L1SQNNR50.AvgProbD(8,2:15,4),'-go',...
    L1SQNNR50.AvgProbFA(8,2:15,5),L1SQNNR50.AvgProbD(8,2:15,5),'-mo',...
    L1SQNNR50.AvgProbFA(12,2:15,1),L1SQNNR50.AvgProbD(12,2:15,1),'-kp',...
    L1SQNNR50.AvgProbFA(12,2:15,2),L1SQNNR50.AvgProbD(12,2:15,2),'-bp',...
    L1SQNNR50.AvgProbFA(12,2:15,3),L1SQNNR50.AvgProbD(12,2:15,3),'-rp',...
    L1SQNNR50.AvgProbFA(12,2:15,4),L1SQNNR50.AvgProbD(12,2:15,4),'-gp',...
    L1SQNNR50.AvgProbFA(12,2:15,5),L1SQNNR50.AvgProbD(12,2:15,5),'-mp')
%axis([0 Sparsity_Levels(end)]);
xlabel('Probability of False Alarm','Fontsize',12)
ylabel('Probability of Detection','Fontsize',12)
title('ROC curves for L1SQNN with Random Arrays, SNR = 50 dB','Fontsize',12)
legend('\beta = 10','\beta = 14', '\beta = 18','\beta = 22','\beta = 26','Location','Best')
%set(gca,'XTick',1:15)
grid;
line([.006, .01555],[.93, .468]);
line([0, .006],[.93, .46]);
rectangle('Position', [0, .93, .006, .05], ...
          'EdgeColor', [0.4, 0.1, 0.4]);
x_a = 0.648; y_a = 0.615; w_a = 0.13; h_a = 0.13;
ax = axes('Units', 'Normalized', ...
          'Position', [x_a, y_a, w_a, h_a], ...
          'XTick', [], ...
          'YTick', [], ...
          'Box', 'on', ...
          'LineWidth', 2, ...
          'Color', [0.95, 0.99, 0.95]);
hold on;
plot(L1SQNNR50.AvgProbFA(5,2:15,1),L1SQNNR50.AvgProbD(5,2:15,1),'-k.',...
    L1SQNNR50.AvgProbFA(5,2:15,2),L1SQNNR50.AvgProbD(5,2:15,2),'-b.',...
    L1SQNNR50.AvgProbFA(5,2:15,3),L1SQNNR50.AvgProbD(5,2:15,3),'-r.',...
    L1SQNNR50.AvgProbFA(5,2:15,4),L1SQNNR50.AvgProbD(5,2:15,4),'-g.',...
    L1SQNNR50.AvgProbFA(5,2:15,5),L1SQNNR50.AvgProbD(5,2:15,5),'-m.')
xlabel('Zoom for s = 5','Fontsize',12);
axis([0, .01, .95, .975]);
hold off

subplot(2,2,3)
plot(L1SQNNR25.AvgProbFA(5,2:15,1),L1SQNNR25.AvgProbD(5,2:15,1),'-k.',...
    L1SQNNR25.AvgProbFA(5,2:15,2),L1SQNNR25.AvgProbD(5,2:15,2),'-b.',...
    L1SQNNR25.AvgProbFA(5,2:15,3),L1SQNNR25.AvgProbD(5,2:15,3),'-r.',...
    L1SQNNR25.AvgProbFA(5,2:15,4),L1SQNNR25.AvgProbD(5,2:15,4),'-g.',...
    L1SQNNR25.AvgProbFA(5,2:15,5),L1SQNNR25.AvgProbD(5,2:15,5),'-m.',...
    L1SQNNR25.AvgProbFA(8,2:15,1),L1SQNNR25.AvgProbD(8,2:15,1),'-ko',...
    L1SQNNR25.AvgProbFA(8,2:15,2),L1SQNNR25.AvgProbD(8,2:15,2),'-bo',...
    L1SQNNR25.AvgProbFA(8,2:15,3),L1SQNNR25.AvgProbD(8,2:15,3),'-ro',...
    L1SQNNR25.AvgProbFA(8,2:15,4),L1SQNNR25.AvgProbD(8,2:15,4),'-go',...
    L1SQNNR25.AvgProbFA(8,2:15,5),L1SQNNR25.AvgProbD(8,2:15,5),'-mo',...
    L1SQNNR25.AvgProbFA(12,2:15,1),L1SQNNR25.AvgProbD(12,2:15,1),'-kp',...
    L1SQNNR25.AvgProbFA(12,2:15,2),L1SQNNR25.AvgProbD(12,2:15,2),'-bp',...
    L1SQNNR25.AvgProbFA(12,2:15,3),L1SQNNR25.AvgProbD(12,2:15,3),'-rp',...
    L1SQNNR25.AvgProbFA(12,2:15,4),L1SQNNR25.AvgProbD(12,2:15,4),'-gp',...
    L1SQNNR25.AvgProbFA(12,2:15,5),L1SQNNR25.AvgProbD(12,2:15,5),'-mp')
%axis([0 Sparsity_Levels(end)]);
xlabel('Probability of False Alarm','Fontsize',12)
ylabel('Probability of Detection','Fontsize',12)
title('ROC curves for L1SQNN with Random Arrays, SNR = 25 dB','Fontsize',12)
legend('\beta = 4','\beta = 7', '\beta = 10','\beta = 13','\beta = 16','Location','Best')
%set(gca,'XTick',1:15)
grid;

subplot(2,2,4)
plot(L1SQNNR15.AvgProbFA(5,2:15,1),L1SQNNR15.AvgProbD(5,2:15,1),'-k.',...
    L1SQNNR15.AvgProbFA(5,2:15,2),L1SQNNR15.AvgProbD(5,2:15,2),'-b.',...
    L1SQNNR15.AvgProbFA(5,2:15,3),L1SQNNR15.AvgProbD(5,2:15,3),'-r.',...
    L1SQNNR15.AvgProbFA(5,2:15,4),L1SQNNR15.AvgProbD(5,2:15,4),'-g.',...
    L1SQNNR15.AvgProbFA(5,2:15,5),L1SQNNR15.AvgProbD(5,2:15,5),'-m.',...
    L1SQNNR15.AvgProbFA(8,2:15,1),L1SQNNR15.AvgProbD(8,2:15,1),'-ko',...
    L1SQNNR15.AvgProbFA(8,2:15,2),L1SQNNR15.AvgProbD(8,2:15,2),'-bo',...
    L1SQNNR15.AvgProbFA(8,2:15,3),L1SQNNR15.AvgProbD(8,2:15,3),'-ro',...
    L1SQNNR15.AvgProbFA(8,2:15,4),L1SQNNR15.AvgProbD(8,2:15,4),'-go',...
    L1SQNNR15.AvgProbFA(8,2:15,5),L1SQNNR15.AvgProbD(8,2:15,5),'-mo',...
    L1SQNNR15.AvgProbFA(12,2:15,1),L1SQNNR15.AvgProbD(12,2:15,1),'-kp',...
    L1SQNNR15.AvgProbFA(12,2:15,2),L1SQNNR15.AvgProbD(12,2:15,2),'-bp',...
    L1SQNNR15.AvgProbFA(12,2:15,3),L1SQNNR15.AvgProbD(12,2:15,3),'-rp',...
    L1SQNNR15.AvgProbFA(12,2:15,4),L1SQNNR15.AvgProbD(12,2:15,4),'-gp',...
    L1SQNNR15.AvgProbFA(12,2:15,5),L1SQNNR15.AvgProbD(12,2:15,5),'-mp')
axis([0 .04 0 1]);
xlabel('Probability of False Alarm','Fontsize',12)
ylabel('Probability of Detection','Fontsize',12)
title('ROC curves for L1SQNN with Random Arrays, SNR = 15 dB','Fontsize',12)
legend('\beta = 2','\beta = 5', '\beta = 8','\beta = 11','\beta = 14','Location','Best')
%set(gca,'XTick',1:15)
grid;

%% Plot the number of Iterations
figure(402)
subplot(2,2,1)
plot(Sparsity_Levels,L1SQNNRINF.AvgNbrItr(:,1,5),'-mp',...
    Sparsity_Levels,L1SQNNRINF.AvgNbrItr(:,1,4),'-gs',...
    Sparsity_Levels,L1SQNNRINF.AvgNbrItr(:,1,3),'-r.',...
    Sparsity_Levels,L1SQNNRINF.AvgNbrItr(:,1,2),'-bo',...
    Sparsity_Levels,L1SQNNRINF.AvgNbrItr(:,1,1),'-kx')
%axis([0 Sparsity_Levels(end)]);
xlabel('Sparsity Level','Fontsize',14)
ylabel('Avg Number of Iterations','Fontsize',14)
title({'Average Number of Iterations, No Noise'},'Fontsize',14)
legend('\beta = 30','\beta = 25', '\beta = 20','\beta = 15','\beta = 10','Location','Best')
set(gca,'XTick',1:15)
grid;

subplot(2,2,2)
plot(Sparsity_Levels,L1SQNNR50.AvgNbrItr(:,1,5),'-mp',...
    Sparsity_Levels,L1SQNNR50.AvgNbrItr(:,1,4),'-gs',...
    Sparsity_Levels,L1SQNNR50.AvgNbrItr(:,1,3),'-r.',...
    Sparsity_Levels,L1SQNNR50.AvgNbrItr(:,1,2),'-bo',...
    Sparsity_Levels,L1SQNNR50.AvgNbrItr(:,1,1),'-kx')
%axis([0 Sparsity_Levels(end)]);
xlabel('Sparsity Level','Fontsize',14)
ylabel('Avg Number of Iterations','Fontsize',14)
title({'Average Number of Iterations, SNR = 50 dB'},'Fontsize',14)
legend('\beta = 26','\beta = 22', '\beta = 18','\beta = 14','\beta = 10','Location','Best')
set(gca,'XTick',1:15)
grid;

subplot(2,2,3)
plot(Sparsity_Levels,L1SQNNR25.AvgNbrItr(:,1,5),'-mp',...
    Sparsity_Levels,L1SQNNR25.AvgNbrItr(:,1,4),'-gs',...
    Sparsity_Levels,L1SQNNR25.AvgNbrItr(:,1,3),'-r.',...
    Sparsity_Levels,L1SQNNR25.AvgNbrItr(:,1,2),'-bo',...
    Sparsity_Levels,L1SQNNR25.AvgNbrItr(:,1,1),'-kx')
%axis([0 Sparsity_Levels(end)]);
xlabel('Sparsity Level','Fontsize',14)
ylabel('Avg Number of Iterations','Fontsize',14)
title({'Average Number of Iterations, SNR = 25 dB'},'Fontsize',14)
legend('\beta = 16','\beta = 13', '\beta = 10','\beta = 7','\beta = 4','Location','Best')
set(gca,'XTick',1:15)
grid;

subplot(2,2,4)
plot(Sparsity_Levels,L1SQNNR15.AvgNbrItr(:,1,5),'-mp',...
    Sparsity_Levels,L1SQNNR15.AvgNbrItr(:,1,4),'-gs',...
    Sparsity_Levels,L1SQNNR15.AvgNbrItr(:,1,3),'-r.',...
    Sparsity_Levels,L1SQNNR15.AvgNbrItr(:,1,2),'-bo',...
    Sparsity_Levels,L1SQNNR15.AvgNbrItr(:,1,1),'-kx')
%axis([0 Sparsity_Levels(end)]);
xlabel('Sparsity Level','Fontsize',14)
ylabel('Avg Number of Iterations','Fontsize',14)
title({'Average Number of Iterations, SNR = 15 dB'},'Fontsize',14)
legend('\beta = 14','\beta = 11', '\beta = 8','\beta = 5','\beta = 2','Location','Best')
set(gca,'XTick',1:15)
grid;
