# Supplementary material for: Compressed Sensing in On-Grid MIMO Radar
Source: ScientificWorldJournal. 2015 Sep 30;2015:397878. doi: 10.1155/2015/397878 (PMC4870333; doi:10.1155/2015/397878)
Supplement: Supplementary file 1 — The Supplementary Material accompanying this paper is a TAR file containing the MATLAB files needed to reproduce the results of the paper. These include the exact code used in each experiment, the resulting data sets from each experiment, and the code to generate the plots for each of these data sets. [file 397878.f1.tar › MFM_Radar_Reproducibles-2015-08-21/MFM_Radar_Reproducibles/Data and Plots/Experiment 6 Data and Plots/Experiment_6_Plots.m]

%% SNR = 30 dB, s = {4,6,8,10,12} 
% B = 10MHz
figure(600)
subplot(2,2,1)
plot(L1SQNNR.AvgProbFA(2,2:15,1),L1SQNNR.AvgProbD(2,2:15,1),'-k.',...
     L1SQNNR.AvgProbFA(3,2:15,1),L1SQNNR.AvgProbD(3,2:15,1),'-b*',...
     L1SQNNR.AvgProbFA(4,2:15,1),L1SQNNR.AvgProbD(4,2:15,1),'-ro',...
     L1SQNNR.AvgProbFA(5,2:15,1),L1SQNNR.AvgProbD(5,2:15,1),'-gd')
%axis([0 Sparsity_Levels(end)]);
xlabel('Probability of False Alarm','Fontsize',12)
ylabel('Probability of Detection','Fontsize',12)
title({'ROC curves for L1SQNN with', 'Random Arrays, B = 10 MHz, SNR = 30 dB'},'Fontsize',15)
legend('s = 6', 's = 8', 's = 10', 's = 12','Location','Best')
%set(gca,'XTick',1:15)
grid;

% B = 15MHz
subplot(2,2,2)
plot(L1SQNNR.AvgProbFA(2,2:15,2),L1SQNNR.AvgProbD(2,2:15,2),'-k.',...
     L1SQNNR.AvgProbFA(3,2:15,2),L1SQNNR.AvgProbD(3,2:15,2),'-b*',...
     L1SQNNR.AvgProbFA(4,2:15,2),L1SQNNR.AvgProbD(4,2:15,2),'-ro',...
     L1SQNNR.AvgProbFA(5,2:15,2),L1SQNNR.AvgProbD(5,2:15,2),'-gd')
%axis([0 Sparsity_Levels(end)]);
xlabel('Probability of False Alarm','Fontsize',13)
ylabel('Probability of Detection','Fontsize',13)
title({'ROC curves for L1SQNN with', 'Random Arrays, B = 15 MHz, SNR = 30 dB'},'Fontsize',15)
legend('s = 6', 's = 8', 's = 10', 's = 12','Location','Best')
%set(gca,'XTick',1:15)
grid;

% B = 20MHz
subplot(2,2,3)
plot(L1SQNNR.AvgProbFA(2,2:15,3),L1SQNNR.AvgProbD(2,2:15,3),'-k.',...
     L1SQNNR.AvgProbFA(3,2:15,3),L1SQNNR.AvgProbD(3,2:15,3),'-b*',...
     L1SQNNR.AvgProbFA(4,2:15,3),L1SQNNR.AvgProbD(4,2:15,3),'-ro',...
     L1SQNNR.AvgProbFA(5,2:15,3),L1SQNNR.AvgProbD(5,2:15,3),'-gd')
%axis([0 Sparsity_Levels(end)]);
xlabel('Probability of False Alarm','Fontsize',15)
ylabel('Probability of Detection','Fontsize',15)
title({'ROC curves for L1SQNN with', 'Random Arrays, B = 20 MHz, SNR = 30 dB'},'Fontsize',15)
legend('s = 6', 's = 8', 's = 10', 's = 12','Location','Best')
%set(gca,'XTick',1:15)
grid;

% B = 25MHz
subplot(2,2,4)
plot(L1SQNNR.AvgProbFA(2,2:15,5),L1SQNNR.AvgProbD(2,2:15,5),'-k.',...
     L1SQNNR.AvgProbFA(3,2:15,5),L1SQNNR.AvgProbD(3,2:15,5),'-b*',...
     L1SQNNR.AvgProbFA(4,2:15,5),L1SQNNR.AvgProbD(4,2:15,5),'-ro',...
     L1SQNNR.AvgProbFA(5,2:15,5),L1SQNNR.AvgProbD(5,2:15,5),'-gd')
%axis([0 Sparsity_Levels(end)]);
xlabel('Probability of False Alarm','Fontsize',12)
ylabel('Probability of Detection','Fontsize',12)
title({'ROC curves for L1SQNN with', 'Random Arrays, B = 25 MHz, SNR = 30 dB'},'Fontsize',15)
legend('s = 6', 's = 8', 's = 10', 's = 12','Location','Best')
%set(gca,'XTick',1:15)
grid;


%% SNR = 30 dB, s = {4,6,8,10,12} 
% B=10MHz
figure(601)
subplot(2,2,1)
plot(L1SQNNR.AvgProbFA(2,2:15,1),L1SQNNR.AvgProbD(2,2:15,1),'-k.',...
     L1SQNNR.AvgProbFA(3,2:15,1),L1SQNNR.AvgProbD(3,2:15,1),'-b*',...
     L1SQNNR.AvgProbFA(4,2:15,1),L1SQNNR.AvgProbD(4,2:15,1),'-ro',...
     L1SQNNR.AvgProbFA(5,2:15,1),L1SQNNR.AvgProbD(5,2:15,1),'-gd')
%axis([0 Sparsity_Levels(end)]);
xlabel('Probability of False Alarm','Fontsize',12)
ylabel('Probability of Detection','Fontsize',12)
title({'ROC curves for L1SQNN with', 'Random Arrays, B = 10 MHz, SNR = 30 dB'},'Fontsize',15)
legend('s = 6', 's = 8', 's = 10', 's = 12','Location','Best')
%set(gca,'XTick',1:15)
grid;

% B=15MHz
subplot(2,2,2)
plot(L1SQNNR.AvgProbFA(2,2:15,2),L1SQNNR.AvgProbD(2,2:15,2),'-k.',...
     L1SQNNR.AvgProbFA(3,2:15,2),L1SQNNR.AvgProbD(3,2:15,2),'-b*',...
     L1SQNNR.AvgProbFA(4,2:15,2),L1SQNNR.AvgProbD(4,2:15,2),'-ro',...
     L1SQNNR.AvgProbFA(5,2:15,2),L1SQNNR.AvgProbD(5,2:15,2),'-gd')
%axis([0 Sparsity_Levels(end)]);
xlabel('Probability of False Alarm','Fontsize',13)
ylabel('Probability of Detection','Fontsize',13)
title({'ROC curves for L1SQNN with', 'Random Arrays, B = 15 MHz, SNR = 30 dB'},'Fontsize',15)
legend('s = 6', 's = 8', 's = 10', 's = 12','Location','Best')
%set(gca,'XTick',1:15)
grid;

% B=20MHz
subplot(2,2,3)
plot(L1SQNNR.AvgProbFA(2,2:15,3),L1SQNNR.AvgProbD(2,2:15,3),'-k.',...
     L1SQNNR.AvgProbFA(3,2:15,3),L1SQNNR.AvgProbD(3,2:15,3),'-b*',...
     L1SQNNR.AvgProbFA(4,2:15,3),L1SQNNR.AvgProbD(4,2:15,3),'-ro',...
     L1SQNNR.AvgProbFA(5,2:15,3),L1SQNNR.AvgProbD(5,2:15,3),'-gd')
%axis([0 Sparsity_Levels(end)]);
xlabel('Probability of False Alarm','Fontsize',15)
ylabel('Probability of Detection','Fontsize',15)
title({'ROC curves for L1SQNN with', 'Random Arrays, B = 20 MHz, SNR = 30 dB'},'Fontsize',15)
legend('s = 6', 's = 8', 's = 10', 's = 12','Location','Best')
%set(gca,'XTick',1:15)
grid;

% B=22MHz
subplot(2,2,4)
plot(L1SQNNR.AvgProbFA(2,2:15,4),L1SQNNR.AvgProbD(2,2:15,4),'-k.',...
     L1SQNNR.AvgProbFA(3,2:15,4),L1SQNNR.AvgProbD(3,2:15,4),'-b*',...
     L1SQNNR.AvgProbFA(4,2:15,4),L1SQNNR.AvgProbD(4,2:15,4),'-ro',...
     L1SQNNR.AvgProbFA(5,2:15,4),L1SQNNR.AvgProbD(5,2:15,4),'-gd')
%axis([0 Sparsity_Levels(end)]);
xlabel('Probability of False Alarm','Fontsize',17)
ylabel('Probability of Detection','Fontsize',17)
title({'ROC curves for L1SQNN with', 'Random Arrays, B = 22 MHz, SNR = 30 dB'},'Fontsize',15)
legend('s = 6', 's = 8', 's = 10', 's = 12','Location','Best')
%set(gca,'XTick',1:17)
grid;

%% SNR = 30 dB, s = {4,6,8,10,12} 
% B=25MHz
figure(602)
subplot(2,2,1)
plot(L1SQNNR.AvgProbFA(2,2:15,5),L1SQNNR.AvgProbD(2,2:15,5),'-k.',...
     L1SQNNR.AvgProbFA(3,2:15,5),L1SQNNR.AvgProbD(3,2:15,5),'-b*',...
     L1SQNNR.AvgProbFA(4,2:15,5),L1SQNNR.AvgProbD(4,2:15,5),'-ro',...
     L1SQNNR.AvgProbFA(5,2:15,5),L1SQNNR.AvgProbD(5,2:15,5),'-gd')
%axis([0 Sparsity_Levels(end)]);
xlabel('Probability of False Alarm','Fontsize',12)
ylabel('Probability of Detection','Fontsize',12)
title({'ROC curves for L1SQNN with', 'Random Arrays, B = 25 MHz, SNR = 30 dB'},'Fontsize',15)
legend('s = 6', 's = 8', 's = 10', 's = 12','Location','Best')
%set(gca,'XTick',1:15)
grid;

% B=27MHz
subplot(2,2,2)
plot(L1SQNNR.AvgProbFA(2,2:15,6),L1SQNNR.AvgProbD(2,2:15,6),'-k.',...
     L1SQNNR.AvgProbFA(3,2:15,6),L1SQNNR.AvgProbD(3,2:15,6),'-b*',...
     L1SQNNR.AvgProbFA(4,2:15,6),L1SQNNR.AvgProbD(4,2:15,6),'-ro',...
     L1SQNNR.AvgProbFA(5,2:15,6),L1SQNNR.AvgProbD(5,2:15,6),'-gd')
%axis([0 Sparsity_Levels(end)]);
xlabel('Probability of False Alarm','Fontsize',13)
ylabel('Probability of Detection','Fontsize',13)
title({'ROC curves for L1SQNN with', 'Random Arrays, B = 27 MHz, SNR = 30 dB'},'Fontsize',15)
legend('s = 6', 's = 8', 's = 10', 's = 12','Location','Best')
%set(gca,'XTick',1:15)
grid;

% B=30MHz
subplot(2,2,3)
plot(L1SQNNR.AvgProbFA(2,2:15,7),L1SQNNR.AvgProbD(2,2:15,7),'-k.',...
     L1SQNNR.AvgProbFA(3,2:15,7),L1SQNNR.AvgProbD(3,2:15,7),'-b*',...
     L1SQNNR.AvgProbFA(4,2:15,7),L1SQNNR.AvgProbD(4,2:15,7),'-ro',...
     L1SQNNR.AvgProbFA(5,2:15,7),L1SQNNR.AvgProbD(5,2:15,7),'-gd')
%axis([0 Sparsity_Levels(end)]);
xlabel('Probability of False Alarm','Fontsize',15)
ylabel('Probability of Detection','Fontsize',15)
title({'ROC curves for L1SQNN with', 'Random Arrays, B = 30 MHz, SNR = 30 dB'},'Fontsize',15)
legend('s = 6', 's = 8', 's = 10', 's = 12','Location','Best')
%set(gca,'XTick',1:15)
grid;

% B=35MHz
subplot(2,2,4)
plot(L1SQNNR.AvgProbFA(2,2:15,8),L1SQNNR.AvgProbD(2,2:15,8),'-k.',...
     L1SQNNR.AvgProbFA(3,2:15,8),L1SQNNR.AvgProbD(3,2:15,8),'-b*',...
     L1SQNNR.AvgProbFA(4,2:15,8),L1SQNNR.AvgProbD(4,2:15,8),'-ro',...
     L1SQNNR.AvgProbFA(5,2:15,8),L1SQNNR.AvgProbD(5,2:15,8),'-gd')
%axis([0 Sparsity_Levels(end)]);
xlabel('Probability of False Alarm','Fontsize',17)
ylabel('Probability of Detection','Fontsize',17)
title({'ROC curves for L1SQNN with', 'Random Arrays, B = 35 MHz, SNR = 30 dB'},'Fontsize',15)
legend('s = 6', 's = 8', 's = 10', 's = 12','Location','Best')
%set(gca,'XTick',1:17)
grid;


%% SNR = 30 dB, s = {4,6,8,10,12} B=10MHz
figure(610)
plot(L1SQNNR.AvgProbFA(1,2:15,1),L1SQNNR.AvgProbD(1,2:15,1),'-k.',...
     L1SQNNR.AvgProbFA(2,2:15,1),L1SQNNR.AvgProbD(2,2:15,1),'-b*',...
     L1SQNNR.AvgProbFA(3,2:15,1),L1SQNNR.AvgProbD(3,2:15,1),'-ro',...
     L1SQNNR.AvgProbFA(4,2:15,1),L1SQNNR.AvgProbD(4,2:15,1),'-gd',...
     L1SQNNR.AvgProbFA(5,2:15,1),L1SQNNR.AvgProbD(5,2:15,1),'-mx')
%axis([0 Sparsity_Levels(end)]);
xlabel('Probability of False Alarm','Fontsize',12)
ylabel('Probability of Detection','Fontsize',12)
title('ROC curves for L1SQNN with Random Arrays, B = 10 MHz, SNR = 30 dB','Fontsize',12)
legend('s = 4','s = 6', 's = 8','s = 10', 's = 12' ,'Location','Best')
%set(gca,'XTick',1:15)
grid;

%% SNR = 30 dB, s = {4,6,8,10,12} B=15MHz
figure(611)
plot(L1SQNNR.AvgProbFA(1,2:15,2),L1SQNNR.AvgProbD(1,2:15,2),'-k.',...
     L1SQNNR.AvgProbFA(2,2:15,2),L1SQNNR.AvgProbD(2,2:15,2),'-b*',...
     L1SQNNR.AvgProbFA(3,2:15,2),L1SQNNR.AvgProbD(3,2:15,2),'-ro',...
     L1SQNNR.AvgProbFA(4,2:15,2),L1SQNNR.AvgProbD(4,2:15,2),'-gd',...
     L1SQNNR.AvgProbFA(5,2:15,2),L1SQNNR.AvgProbD(5,2:15,2),'-mx')
%axis([0 Sparsity_Levels(end)]);
xlabel('Probability of False Alarm','Fontsize',12)
ylabel('Probability of Detection','Fontsize',12)
title('ROC curves for L1SQNN with Random Arrays, B = 15 MHz, SNR = 30 dB','Fontsize',12)
legend('s = 4','s = 6', 's = 8','s = 10', 's = 12' ,'Location','Best')
%set(gca,'XTick',1:15)
grid;

%% SNR = 30 dB, s = {4,6,8,10,12} B=20MHz
figure(612)
plot(L1SQNNR.AvgProbFA(1,2:15,3),L1SQNNR.AvgProbD(1,2:15,3),'-k.',...
     L1SQNNR.AvgProbFA(2,2:15,3),L1SQNNR.AvgProbD(2,2:15,3),'-b*',...
     L1SQNNR.AvgProbFA(3,2:15,3),L1SQNNR.AvgProbD(3,2:15,3),'-ro',...
     L1SQNNR.AvgProbFA(4,2:15,3),L1SQNNR.AvgProbD(4,2:15,3),'-gd',...
     L1SQNNR.AvgProbFA(5,2:15,3),L1SQNNR.AvgProbD(5,2:15,3),'-mx')
%axis([0 Sparsity_Levels(end)]);
xlabel('Probability of False Alarm','Fontsize',12)
ylabel('Probability of Detection','Fontsize',12)
title('ROC curves for L1SQNN with Random Arrays, B= 20 MHz, SNR = 30 dB','Fontsize',12)
legend('s = 4','s = 6', 's = 8','s = 10', 's = 12' ,'Location','Best')
%set(gca,'XTick',1:15)
grid;

%% SNR = 30 dB, s = {4,6,8,10,12} B=22MHz
figure(613)
plot(L1SQNNR.AvgProbFA(1,2:15,4),L1SQNNR.AvgProbD(1,2:15,4),'-k.',...
     L1SQNNR.AvgProbFA(2,2:15,4),L1SQNNR.AvgProbD(2,2:15,4),'-b*',...
     L1SQNNR.AvgProbFA(3,2:15,4),L1SQNNR.AvgProbD(3,2:15,4),'-ro',...
     L1SQNNR.AvgProbFA(4,2:15,4),L1SQNNR.AvgProbD(4,2:15,4),'-gd',...
     L1SQNNR.AvgProbFA(5,2:15,4),L1SQNNR.AvgProbD(5,2:15,4),'-mx')
%axis([0 Sparsity_Levels(end)]);
xlabel('Probability of False Alarm','Fontsize',12)
ylabel('Probability of Detection','Fontsize',12)
title('ROC curves for L1SQNN with Random Arrays, B = 22 MHz, SNR = 30 dB','Fontsize',12)
legend('s = 4','s = 6', 's = 8','s = 10', 's = 12' ,'Location','Best')
%set(gca,'XTick',1:15)
grid;

%% SNR = 30 dB, s = {4,6,8,10,12} B=25MHz
figure(614)
plot(L1SQNNR.AvgProbFA(1,2:15,5),L1SQNNR.AvgProbD(1,2:15,5),'-k.',...
     L1SQNNR.AvgProbFA(2,2:15,5),L1SQNNR.AvgProbD(2,2:15,5),'-b*',...
     L1SQNNR.AvgProbFA(3,2:15,5),L1SQNNR.AvgProbD(3,2:15,5),'-ro',...
     L1SQNNR.AvgProbFA(4,2:15,5),L1SQNNR.AvgProbD(4,2:15,5),'-gd',...
     L1SQNNR.AvgProbFA(5,2:15,5),L1SQNNR.AvgProbD(5,2:15,5),'-mx')
%axis([0 Sparsity_Levels(end)]);
xlabel('Probability of False Alarm','Fontsize',12)
ylabel('Probability of Detection','Fontsize',12)
title('ROC curves for L1SQNN with Random Arrays, B = 25 MHz, SNR = 30 dB','Fontsize',12)
legend('s = 4','s = 6', 's = 8','s = 10', 's = 12' ,'Location','Best')
%set(gca,'XTick',1:15)
grid;

%% SNR = 30 dB, s = {4,6,8,10,12} B=27MHz
figure(615)
plot(L1SQNNR.AvgProbFA(1,2:15,6),L1SQNNR.AvgProbD(1,2:15,6),'-k.',...
     L1SQNNR.AvgProbFA(2,2:15,6),L1SQNNR.AvgProbD(2,2:15,6),'-b*',...
     L1SQNNR.AvgProbFA(3,2:15,6),L1SQNNR.AvgProbD(3,2:15,6),'-ro',...
     L1SQNNR.AvgProbFA(4,2:15,6),L1SQNNR.AvgProbD(4,2:15,6),'-gd',...
     L1SQNNR.AvgProbFA(5,2:15,6),L1SQNNR.AvgProbD(5,2:15,6),'-mx')
%axis([0 Sparsity_Levels(end)]);
xlabel('Probability of False Alarm','Fontsize',12)
ylabel('Probability of Detection','Fontsize',12)
title('ROC curves for L1SQNN with Random Arrays, B = 27 MHz, SNR = 30 dB','Fontsize',12)
legend('s = 4','s = 6', 's = 8','s = 10', 's = 12' ,'Location','Best')
%set(gca,'XTick',1:16)
grid;

%% SNR = 30 dB, s = {4,6,8,10,12} B=30MHz
figure(616)
plot(L1SQNNR.AvgProbFA(1,2:15,7),L1SQNNR.AvgProbD(1,2:15,7),'-k.',...
     L1SQNNR.AvgProbFA(2,2:15,7),L1SQNNR.AvgProbD(2,2:15,7),'-b*',...
     L1SQNNR.AvgProbFA(3,2:15,7),L1SQNNR.AvgProbD(3,2:15,7),'-ro',...
     L1SQNNR.AvgProbFA(4,2:15,7),L1SQNNR.AvgProbD(4,2:15,7),'-gd',...
     L1SQNNR.AvgProbFA(5,2:15,7),L1SQNNR.AvgProbD(5,2:15,7),'-mx')
%axis([0 Sparsity_Levels(end)]);
xlabel('Probability of False Alarm','Fontsize',12)
ylabel('Probability of Detection','Fontsize',12)
title('ROC curves for L1SQNN with Random Arrays, B = 30 MHz, SNR = 30 dB','Fontsize',12)
legend('s = 4','s = 6', 's = 8','s = 10', 's = 12' ,'Location','Best')
%set(gca,'XTick',1:17)
grid;

%% SNR = 30 dB, s = {4,6,8,10,12} B=35MHz
figure(617)
plot(L1SQNNR.AvgProbFA(1,2:15,8),L1SQNNR.AvgProbD(1,2:15,8),'-k.',...
     L1SQNNR.AvgProbFA(2,2:15,8),L1SQNNR.AvgProbD(2,2:15,8),'-b*',...
     L1SQNNR.AvgProbFA(3,2:15,8),L1SQNNR.AvgProbD(3,2:15,8),'-ro',...
     L1SQNNR.AvgProbFA(4,2:15,8),L1SQNNR.AvgProbD(4,2:15,8),'-gd',...
     L1SQNNR.AvgProbFA(5,2:15,8),L1SQNNR.AvgProbD(5,2:15,8),'-mx')
%axis([0 Sparsity_Levels(end)]);
xlabel('Probability of False Alarm','Fontsize',12)
ylabel('Probability of Detection','Fontsize',12)
title('ROC curves for L1SQNN with Random Arrays, B = 35 MHz, SNR = 30 dB','Fontsize',12)
legend('s = 4','s = 6', 's = 8','s = 10', 's = 12' ,'Location','Best')
%set(gca,'XTick',1:17)
grid;


%% Plot ROC Together SNR = 30 dB, s= 3, B=[10e6 12e6 15e6 18e6 20e6 30e6 35e6]
figure(620)
plot(L1SQNNR.AvgProbFA(1,2:15,1),L1SQNNR.AvgProbD(1,2:15,1),'-k.',...
     L1SQNNR.AvgProbFA(1,2:15,2),L1SQNNR.AvgProbD(1,2:15,2),'-b*',...
     L1SQNNR.AvgProbFA(1,2:15,3),L1SQNNR.AvgProbD(1,2:15,3),'-ro',...
     L1SQNNR.AvgProbFA(1,2:15,4),L1SQNNR.AvgProbD(1,2:15,4),'-gd',...
     L1SQNNR.AvgProbFA(1,2:15,5),L1SQNNR.AvgProbD(1,2:15,5),'-mx',...
     L1SQNNR.AvgProbFA(1,2:15,6),L1SQNNR.AvgProbD(1,2:15,6),'-c+',...
     L1SQNNR.AvgProbFA(1,2:15,7),L1SQNNR.AvgProbD(1,2:15,7),'-y^')
%axis([0 Sparsity_Levels(end)]);
xlabel('Probability of False Alarm','Fontsize',12)
ylabel('Probability of Detection','Fontsize',12)
title({'ROC curves for L1SQNN with','Random Arrays, s = 3, SNR = 30 dB'},'Fontsize',12)
legend('B = 10','B = 12', 'B = 15','B = 18', 'B = 20', 'B = 30', 'B = 35' ,'Location','Best')
%set(gca,'XTick',1:15)
grid;

%% SNR = 30 dB, s= 4, B=[10e6 12e6 15e6 18e6 20e6 30e6 35e6]
figure(621)
plot(L1SQNNR.AvgProbFA(2,2:15,1),L1SQNNR.AvgProbD(2,2:15,1),'-k.',...
     L1SQNNR.AvgProbFA(2,2:15,2),L1SQNNR.AvgProbD(2,2:15,2),'-b*',...
     L1SQNNR.AvgProbFA(2,2:15,3),L1SQNNR.AvgProbD(2,2:15,3),'-ro',...
     L1SQNNR.AvgProbFA(2,2:15,4),L1SQNNR.AvgProbD(2,2:15,4),'-gd',...
     L1SQNNR.AvgProbFA(2,2:15,5),L1SQNNR.AvgProbD(2,2:15,5),'-mx',...
     L1SQNNR.AvgProbFA(2,2:15,6),L1SQNNR.AvgProbD(2,2:15,6),'-c+',...
     L1SQNNR.AvgProbFA(2,2:15,7),L1SQNNR.AvgProbD(2,2:15,7),'-y^')
%axis([0 Sparsity_Levels(end)]);
xlabel('Probability of False Alarm','Fontsize',12)
ylabel('Probability of Detection','Fontsize',12)
title({'ROC curves for L1SQNN with','Random Arrays, s = 4, SNR = 30 dB'},'Fontsize',12)
legend('B = 10','B = 12', 'B = 15','B = 18', 'B = 20', 'B = 30', 'B = 35' ,'Location','Best')
%set(gca,'XTick',1:15)
grid;

%% SNR = 30 dB, s= 5, B=[10e6 12e6 15e6 18e6 20e6 30e6 35e6]
figure(622)
plot(L1SQNNR.AvgProbFA(3,2:15,1),L1SQNNR.AvgProbD(3,2:15,1),'-k.',...
     L1SQNNR.AvgProbFA(3,2:15,2),L1SQNNR.AvgProbD(3,2:15,2),'-b*',...
     L1SQNNR.AvgProbFA(3,2:15,3),L1SQNNR.AvgProbD(3,2:15,3),'-ro',...
     L1SQNNR.AvgProbFA(3,2:15,4),L1SQNNR.AvgProbD(3,2:15,4),'-gd',...
     L1SQNNR.AvgProbFA(3,2:15,5),L1SQNNR.AvgProbD(3,2:15,5),'-mx',...
     L1SQNNR.AvgProbFA(3,2:15,6),L1SQNNR.AvgProbD(3,2:15,6),'-c+',...
     L1SQNNR.AvgProbFA(3,2:15,7),L1SQNNR.AvgProbD(3,2:15,7),'-y^')
%axis([0 Sparsity_Levels(end)]);
xlabel('Probability of False Alarm','Fontsize',12)
ylabel('Probability of Detection','Fontsize',12)
title({'ROC curves for L1SQNN with','Random Arrays, s = 5, SNR = 30 dB'},'Fontsize',12)
legend('B = 10','B = 12', 'B = 15','B = 18', 'B = 20', 'B = 30', 'B = 35' ,'Location','Best')
%set(gca,'XTick',1:15)
grid;


%% SNR = 30 dB, s= 6, B=[10e6 12e6 15e6 18e6 20e6 30e6 35e6]
figure(623)
plot(L1SQNNR.AvgProbFA(4,2:15,1),L1SQNNR.AvgProbD(4,2:15,1),'-k.',...
     L1SQNNR.AvgProbFA(4,2:15,2),L1SQNNR.AvgProbD(4,2:15,2),'-b*',...
     L1SQNNR.AvgProbFA(4,2:15,3),L1SQNNR.AvgProbD(4,2:15,3),'-ro',...
     L1SQNNR.AvgProbFA(4,2:15,4),L1SQNNR.AvgProbD(4,2:15,4),'-gd',...
     L1SQNNR.AvgProbFA(4,2:15,5),L1SQNNR.AvgProbD(4,2:15,5),'-mx',...
     L1SQNNR.AvgProbFA(4,2:15,6),L1SQNNR.AvgProbD(4,2:15,6),'-c+',...
     L1SQNNR.AvgProbFA(4,2:15,7),L1SQNNR.AvgProbD(4,2:15,7),'-y^')
%axis([0 Sparsity_Levels(end)]);
xlabel('Probability of False Alarm','Fontsize',12)
ylabel('Probability of Detection','Fontsize',12)
title({'ROC curves for L1SQNN with','Random Arrays, s = 6, SNR = 30 dB'},'Fontsize',12)
legend('B = 10','B = 12', 'B = 15','B = 18', 'B = 20', 'B = 30', 'B = 35' ,'Location','Best')
%set(gca,'XTick',1:15)
grid;

%% SNR = 30 dB, s= 8, B=[10e6 12e6 15e6 18e6 20e6 30e6 35e6]
figure(624)
plot(L1SQNNR.AvgProbFA(5,2:15,1),L1SQNNR.AvgProbD(5,2:15,1),'-k.',...
     L1SQNNR.AvgProbFA(5,2:15,2),L1SQNNR.AvgProbD(5,2:15,2),'-b*',...
     L1SQNNR.AvgProbFA(5,2:15,3),L1SQNNR.AvgProbD(5,2:15,3),'-ro',...
     L1SQNNR.AvgProbFA(5,2:15,4),L1SQNNR.AvgProbD(5,2:15,4),'-gd',...
     L1SQNNR.AvgProbFA(5,2:15,5),L1SQNNR.AvgProbD(5,2:15,5),'-mx',...
     L1SQNNR.AvgProbFA(5,2:15,6),L1SQNNR.AvgProbD(5,2:15,6),'-c+',...
     L1SQNNR.AvgProbFA(5,2:15,7),L1SQNNR.AvgProbD(5,2:15,7),'-y^')
%axis([0 Sparsity_Levels(end)]);
xlabel('Probability of False Alarm','Fontsize',12)
ylabel('Probability of Detection','Fontsize',12)
title({'ROC curves for L1SQNN with','Random Arrays, s = 8, SNR = 30 dB'},'Fontsize',12)
legend('B = 10','B = 12', 'B = 15','B = 18', 'B = 20', 'B = 30', 'B = 35' ,'Location','Best')
%set(gca,'XTick',1:15)
grid;
