# Supplementary material for: Compressed Sensing in On-Grid MIMO Radar
Source: ScientificWorldJournal. 2015 Sep 30;2015:397878. doi: 10.1155/2015/397878 (PMC4870333; doi:10.1155/2015/397878)
Supplement: Supplementary file 1 — The Supplementary Material accompanying this paper is a TAR file containing the MATLAB files needed to reproduce the results of the paper. These include the exact code used in each experiment, the resulting data sets from each experiment, and the code to generate the plots for each of these data sets. [file 397878.f1.tar › MFM_Radar_Reproducibles-2015-08-21/MFM_Radar_Reproducibles/Experiments/AntennaPositionRandom.m]

function [ p,q ] = AntennaPositionRandom(M,N)
% Generate the random locations of the M transmit antennas
% and the N receive antennas. Uniform Random Distribution.
% Michael F Minner

 L=N*M/2;              % locations of antennas
 p1=sort(L.*rand(M,1)); % p are transmit antenna locations
 q1=sort(L.*rand(N,1)); % q are receive antenna locations

% distances between antennas
p=p1-p1(1);
q=q1-q1(1);

end
