# Supplementary material for: Compressed Sensing in On-Grid MIMO Radar
Source: ScientificWorldJournal. 2015 Sep 30;2015:397878. doi: 10.1155/2015/397878 (PMC4870333; doi:10.1155/2015/397878)
Supplement: Supplementary file 1 — The Supplementary Material accompanying this paper is a TAR file containing the MATLAB files needed to reproduce the results of the paper. These include the exact code used in each experiment, the resulting data sets from each experiment, and the code to generate the plots for each of these data sets. [file 397878.f1.tar › MFM_Radar_Reproducibles-2015-08-21/MFM_Radar_Reproducibles/Experiments/Experiment_1.m]

%% Experiment 1
% %% Uses structure objects

% Compressed Sensing in On-Grid MIMO Radar 
% Test Simulations, SNR = 30dB, random array
% OMP, L1 Square Non Negative Regularization  and
% L1/L2 Constrained Non Negative

% Michael F Minner

%% Clear
clear all;

%% Simulation information

% For each sparsity level, generate N_S signals, N_M matrices
Sparsity_Levels=2:2:28;

N_S=10;N_A=10;N_ss=size(Sparsity_Levels,2);  % Number of signals, random arrays, sparsity levels
N_Sim=N_S*N_A;                             % Number of simulations for each sparsity level

threshold=[.001,.01,.1];                   % Consider different threshold levels for detection
N_thresh=size(threshold,2);                % Number of thresholds considered

SNR=30;            % Signal to noise ratio in dB

OMP.AvgProbD=zeros(N_ss,N_thresh);         % Average of the probabilities of detection
OMP.AvgProbFA=zeros(N_ss,N_thresh);        % and false alarms for each threshold level
OMP.AvgRelErr=zeros(N_ss,N_thresh);        % Average relative error with thresholding
OMP.AvgRelErrNT=zeros(N_ss,1);             % Average relative error without thresholding
OMP.AvgTime=zeros(N_ss,1);                 % Average time to evaluate OMP
OMP.AvgNbrItr=zeros(N_ss,1);               % Average number of iterations for OMP

OMP_ProbD=zeros(N_Sim,N_thresh);           % Probabilities of detection and false alarm
OMP_ProbFA=zeros(N_Sim,N_thresh);          % for each simulation
OMP_RelErr=zeros(N_Sim,N_thresh);          % Relative error for each simulation with thresholding
OMP_RelErrNT=zeros(N_Sim,1);               % Relative error for each simulation without thresholding
OMP_Time=zeros(N_Sim,1);                   % Time to evaluate OMP
OMP_NbrItr=zeros(N_Sim,1);                 % Number of Iterations to evaluate OMP
% each row is a separate simulation,
% each column is a different threshold

% Repeat for AISS, L1SQNN, L1L2CNN (YALL1)

% AISS.AvgProbD=zeros(N_ss,N_thresh);
% AISS.AvgProbFA=zeros(N_ss,N_thresh);
% AISS.AvgRelErr=zeros(N_ss,N_thresh);
% AISS.AvgRelErrNT=zeros(N_ss,1);
% AISS.AvgTime=zeros(N_ss,1);
% AISS.AvgNbrItr=zeros(N_ss,1);
% 
% AISS_ProbD=zeros(N_Sim,N_thresh);
% AISS_ProbFA=zeros(N_Sim,N_thresh);
% AISS_RelErr=zeros(N_Sim,N_thresh);
% AISS_RelErrNT=zeros(N_Sim,1);
% AISS_Time=zeros(N_Sim,1);
% AISS_NbrItr=zeros(N_Sim,1);


L1SQNN.AvgProbD=zeros(N_ss,N_thresh);
L1SQNN.AvgProbFA=zeros(N_ss,N_thresh);
L1SQNN.AvgRelErr=zeros(N_ss,N_thresh);
L1SQNN.AvgRelErrNT=zeros(N_ss,1);
L1SQNN.AvgTime=zeros(N_ss,1);
L1SQNN.AvgNbrItr=zeros(N_ss,1);

L1SQNN_ProbD=zeros(N_Sim,N_thresh);
L1SQNN_ProbFA=zeros(N_Sim,N_thresh);
L1SQNN_RelErr=zeros(N_Sim,N_thresh);
L1SQNN_RelErrNT=zeros(N_Sim,1);
L1SQNN_Time=zeros(N_Sim,1);
L1SQNN_NbrItr=zeros(N_Sim,1);


L1L2CNN.AvgProbD=zeros(N_ss,N_thresh);
L1L2CNN.AvgProbFA=zeros(N_ss,N_thresh);
L1L2CNN.AvgRelErr=zeros(N_ss,N_thresh);
L1L2CNN.AvgRelErrNT=zeros(N_ss,1);
L1L2CNN.AvgTime=zeros(N_ss,1);
L1L2CNN.AvgNbrItr=zeros(N_ss,1);

L1L2CNN_ProbD=zeros(N_Sim,N_thresh);
L1L2CNN_ProbFA=zeros(N_Sim,N_thresh);
L1L2CNN_RelErr=zeros(N_Sim,N_thresh);
L1L2CNN_RelErrNT=zeros(N_Sim,1);
L1L2CNN_Time=zeros(N_Sim,1);
L1L2CNN_NbrItr=zeros(N_Sim,1);

fname=['Experiment_1_Sparisty_Levels_', num2str(N_ss), '.mat'];
%% Initialization


M=5;         % # of Transmitters
N=5;         % # of Receivers.
Q=15;         % # of samples


U=10;         % # of Azimuth Bins
V=10;         % # of Range Bins
W=10;         % # of Doppler Bins

K=U*V*W;      % total # of Bins

P=10;          % sparsity of the target scene

c=3e8;             % speed of light

B=15e6;            % Bandwidth of each transmitted signal 15MHz
T=2e-6;            % Waveform pulse duration
f_c=1e10;          % Carrier frequency of the first transmitter 10GHz
lambda=c/f_c;      % Reference carrier wavelength, lambda = c/f_c
alpha=B/T;         % Chirp rate, alpha=B/T

Range_U=[-.1,.1];                 % range of angles (-.1 to .1) in radians
Range_V=[990,1010];               % range of distances in meters (980 to 1020 meters)
Range_W=[0,30];                   % range of speeds (0 to 30 meters per second)

Range_tau=2.*Range_V./c;          % range of time delays
Range_upsilon=2/lambda.*Range_W;  % range of Doppler shifts

Delta_U=(Range_U(2)-Range_U(1))/U;      % step size in each domain
Delta_V=(Range_V(2)-Range_V(1))/V;
Delta_W=(Range_W(2)-Range_W(1))/W;

Delta_tau=(Range_tau(2)-Range_tau(1))/V;
Delta_upsilon=(Range_upsilon(2)-Range_upsilon(1))/W;

Values_U=Range_U(1):Delta_U:Range_U(2)-Delta_U; % values for each bin
Values_V=Range_V(1):Delta_V:Range_V(2)-Delta_V; % remove additional final bin
Values_W=Range_W(1):Delta_W:Range_W(2)-Delta_W;

Values_tau=Range_tau(1):Delta_tau:Range_tau(2)-Delta_tau;
Values_upsilon=Range_upsilon(1):Delta_upsilon:Range_upsilon(2)-Delta_upsilon;

% Sample in time only for targets in the scene...
T_d=Range_tau(2)-Range_tau(1);  % Sample time duration
Delta_Q=T_d/Q;                  % Sample times
Values_T_d=Range_tau(1):Delta_Q:Range_tau(2)-Delta_Q;


%% Simulations

timeStart=tic;
index1=1; % Index for the total number of simulations performed

index4=1; % Index for sparsity
for ss=Sparsity_Levels   % Vary the sparsity level
    
    index2=1; % Index for number of simulations per sparsity
    
    % Calculations for measurement matrices
    [~, weight,A_F, A_G, A_H] = LinearChirp( M,Q,V,W,alpha,T,f_c,Values_tau, Values_upsilon, Values_T_d );
    
    for ii=1:N_A          % The number of signals to generate
        
        % ULA Locations
        %[ p,q] = AntennaPositionUniform(M,N,lambda);
        % Random Antenna Locations
        [ p,q ] = AntennaPositionRandom(M,N);
        
        % Build Antenna Arrays
        [A_T,A_R] = AntennaArray( p,q,lambda, M,N,U,Values_U);
        
        % Measurement Matrix
        %[ A ] = MeasurementMatrix(A_R, A_T, A_F, A_G, A_H, weight,M,N,Q,U,V,W,K);
        [ A ] = MeasurementMatrixVectorized(A_R, A_T, A_F, A_G, A_H, weight,M,N,Q,U,V,W,K);
        
        
        for kk=1:N_S
            
            %Mag=2;            % Magnitude of target reflectivities
            [signal, grid, supp] = TargetScene(ss,U,V,W,K);
            
            % All ones on the support
            signal(supp)=ones(ss,1);
            
            % Take Measurements
            y=A*signal;
            
            % Complex separation
            x=[real(signal);imag(signal)];
            B=[real(A),-imag(A);imag(A),real(A)];
            z=B*x;
            
            % Generate Noise
            PowerSignal=norm(signal(supp)).^2;
            %PowerSignal=norm(y).^2;
            NoiseStdDev=sqrt(PowerSignal/(2*M*N*Q*power(10,SNR/10)));                 % Standard deviation of the noise
            noise=NoiseStdDev.*randn(M*N*Q,1)+NoiseStdDev*1i.*randn(M*N*Q,1);        % Complex Gaussian noise
            
            %noisey measurments
            y=y+noise;
            z=[real(y);imag(y)];
            
            % Recovery
            
            % OMP
            tStartOMP=tic;
            [xOMP,~,~,NbrItrOMP] = omp(y,A,[],200,norm(noise));
            OMP_Time(index2,1)=toc(tStartOMP);
            OMP_NbrItr(index2,1)=NbrItrOMP;
            OMP_RelErrNT(index2,1)=norm(xOMP-signal)/sqrt(PowerSignal);
            xOMP_Abs=abs(xOMP);
            
            
%             % AISS
%             tStartAISS=tic;
%             % [xAISS,~,NbrItrAISS]=CSinvscalespace(B,z);
%             [xAISS,~,NbrItrAISS]=CSinvscalespaceT(B,z);
%             AISS_Time(index2,1)=toc(tStartAISS);
%             AISS_NbrItr(index2,1)=NbrItrAISS;
%             xAISS=xAISS(1:K)+1i.*xAISS(K+1:end);
%             AISS_RelErrNT(index2,1)=norm(xAISS-signal)/sqrt(PowerSignal);
%             xAISS_Abs=abs(xAISS);
            
            
            % L1SQNN
            tStartL1SQNN=tic;
            [xL1SQNN,~,~,NbrItrL1SQNN] = l1sqnnreg(z,B,30);
            L1SQNN_Time(index2,1)=toc(tStartL1SQNN);
            L1SQNN_NbrItr(index2,1)=NbrItrL1SQNN;
            xL1SQNN=xL1SQNN(1:K)+1i.*xL1SQNN(K+1,end);
            L1SQNN_RelErrNT(index2,1)=norm(xL1SQNN-signal)/sqrt(PowerSignal);
            xL1SQNN_Abs=abs(xL1SQNN);
            
            
            % L1L2CNN
            %
            clear opts;
            opts.tol = 1e-10; opts.noNN=1;opts.delta = norm(noise);
            tStartL1L2CNN=tic;
            [xL1L2CNN,Out] = yall1(B,z, opts);
            L1L2CNN_Time(index2,1)=toc(tStartL1L2CNN);
            L1L2CNN_NbrItr(index2,1)=Out.iter;
            xL1L2CNN=xL1L2CNN(1:K)+1i.*xL1L2CNN(K+1:end);
            L1L2CNN_RelErrNT(index2,1)=norm(xL1L2CNN-signal)/sqrt(PowerSignal);
            xL1L2CNN_Abs=abs(xL1L2CNN);
            
            index3=1;
            
            for t=threshold
                
                Removed_OMP=find(xOMP_Abs<t);  % Set entries less than current threshold to zero.
                xOMP(Removed_OMP)=0;
                xOMP_Abs(Removed_OMP)=0;
                SuppOMP=find(xOMP_Abs>=t);     % Support after thresholding
                OMP_RelErr(index2,index3)=norm(xOMP-signal)/sqrt(PowerSignal);              % Relative error after thresholding
                OMP_ProbD(index2,index3)=sum(xOMP_Abs(supp,1)>=t)/ss;                       % Fraction of true targets detected
                OMP_ProbFA(index2,index3)=sum(xOMP_Abs(setdiff(SuppOMP,supp),1)>=t)/(K-ss); % Fraction of false alarms
                
%                 Removed_AISS=find(xAISS_Abs<t);
%                 xAISS(Removed_AISS)=0;
%                 xAISS_Abs(Removed_AISS)=0;
%                 SuppAISS=find(xAISS_Abs>=t);
%                 AISS_RelErr(index2,index3)=norm(xAISS-signal)/sqrt(PowerSignal);
%                 AISS_ProbD(index2,index3)=sum(xAISS_Abs(supp,1)>=t)/ss;
%                 AISS_ProbFA(index2,index3)=sum(xAISS_Abs(setdiff(SuppAISS,supp),1)>=t)/(K-ss);
                
                Removed_L1SQNN=find(xL1SQNN_Abs<t);
                xL1SQNN(Removed_L1SQNN)=0;
                xL1SQNN_Abs(Removed_L1SQNN)=0;
                SuppL1SQNN=find(xL1SQNN_Abs>=t);
                L1SQNN_RelErr(index2,index3)=norm(xL1SQNN-signal)/sqrt(PowerSignal);
                L1SQNN_ProbD(index2,index3)=sum(xL1SQNN_Abs(supp,1)>=t)/ss;
                L1SQNN_ProbFA(index2,index3)=sum(xL1SQNN_Abs(setdiff(SuppL1SQNN,supp),1)>=t)/(K-ss);
                
                Removed_L1L2CNN=find(xL1L2CNN_Abs<t);
                xL1L2CNN(Removed_L1L2CNN)=0;
                xL1L2CNN_Abs(Removed_L1L2CNN)=0;
                SuppL1L2CNN=find(xL1L2CNN_Abs>=t);
                L1L2CNN_RelErr(index2,index3)=norm(xL1L2CNN-signal)/sqrt(PowerSignal);
                L1L2CNN_ProbD(index2,index3)=sum(xL1L2CNN_Abs(supp,1)>=t)/ss;
                L1L2CNN_ProbFA(index2,index3)=sum(xL1L2CNN_Abs(setdiff(SuppL1L2CNN,supp),1)>=t)/(K-ss);
                
                index3=index3+1;
                
            end
            display(['current sparsity: ' num2str(ss) ' current simulation: ' num2str(index2)])
            index2=index2+1;
            index1=index1+1;
        end
    end
    
    OMP.AvgProbD(index4,:)=mean(OMP_ProbD,1);
    OMP.AvgProbFA(index4,:)=mean(OMP_ProbFA,1);
    OMP.AvgRelErr(index4,:)=mean(OMP_RelErr,1);
    OMP.AvgRelErrNT(index4,1)=mean(OMP_RelErrNT,1);
    OMP.AvgTime(index4,1)=mean(OMP_Time,1);
    OMP.AvgNbrItr(index4,1)=mean(OMP_NbrItr,1);
    
%     AISS.AvgProbD(index4,:)=mean(AISS_ProbD,1);
%     AISS.AvgProbFA(index4,:)=mean(AISS_ProbFA,1);
%     AISS.AvgRelErr(index4,:)=mean(AISS_RelErr,1);
%     AISS.AvgRelErrNT(index4,1)=mean(AISS_RelErrNT,1);
%     AISS.AvgTime(index4,1)=mean(AISS_Time,1);
%     AISS.AvgNbrItr(index4,1)=mean(AISS_NbrItr,1);
    
    L1SQNN.AvgProbD(index4,:)=mean(L1SQNN_ProbD,1);
    L1SQNN.AvgProbFA(index4,:)=mean(L1SQNN_ProbFA,1);
    L1SQNN.AvgRelErr(index4,:)=mean(L1SQNN_RelErr,1);
    L1SQNN.AvgRelErrNT(index4,1)=mean(L1SQNN_RelErrNT,1);
    L1SQNN.AvgTime(index4,1)=mean(L1SQNN_Time,1);
    L1SQNN.AvgNbrItr(index4,1)=mean(L1SQNN_NbrItr,1);
    
    L1L2CNN.AvgProbD(index4,:)=mean(L1L2CNN_ProbD,1);
    L1L2CNN.AvgProbFA(index4,:)=mean(L1L2CNN_ProbFA,1);
    L1L2CNN.AvgRelErr(index4,:)=mean(L1L2CNN_RelErr,1);
    L1L2CNN.AvgRelErrNT(index4,1)=mean(L1L2CNN_RelErrNT,1);
    L1L2CNN.AvgTime(index4,1)=mean(L1L2CNN_Time,1);
    L1L2CNN.AvgNbrItr(index4,1)=mean(L1L2CNN_NbrItr,1);
    
    index4=index4+1;
    
    %save(fname, 'OMP', 'AISS', 'L1SQNN', 'L1L2CNN', 'Sparsity_Levels', 'index1', 'index4', 'M', 'N', 'Q', 'U', 'V', 'W', 'K', 'SNR', 'Range_U', 'Range_V', 'Range_W');
    save(fname, 'OMP', 'L1SQNN', 'L1L2CNN', 'Sparsity_Levels', 'index1', 'index4', 'M', 'N', 'Q', 'U', 'V', 'W', 'K', 'SNR', 'Range_U', 'Range_V', 'Range_W');
end
timeStop=toc(timeStart)

%%
figure(1)

subplot(3,2,1)
plot(Sparsity_Levels, OMP.AvgProbD(:,1),'k',Sparsity_Levels,OMP.AvgProbD(:,2),'b',Sparsity_Levels, OMP.AvgProbD(:,3),'r')
%axis([0 Sparsity_Levels(end)]);
xlabel('Sparsity Level','Fontsize',12)
ylabel('Prob of True Detection','Fontsize',12)
title('\it{Average Probability of True Detection OMP}','Fontsize',12)

subplot(3,2,2)
plot(Sparsity_Levels,OMP.AvgProbFA(:,1),'k',Sparsity_Levels, OMP.AvgProbFA(:,2),'b',Sparsity_Levels, OMP.AvgProbFA(:,3),'r')
%axis([0 Sparsity_Levels(end)]);
xlabel('Sparsity Level','Fontsize',12)
ylabel('Avg Prob of False Alarm','Fontsize',12)
title('\it{Average Probability of False Alarm OMP}','Fontsize',12)

subplot(3,2,3)
plot(Sparsity_Levels,OMP.AvgRelErr(:,1),'k',Sparsity_Levels, OMP.AvgRelErr(:,2),'b',Sparsity_Levels, OMP.AvgRelErr(:,3),'r')
%axis([0 Sparsity_Levels(end)]);
xlabel('Sparsity Level','Fontsize',12)
ylabel('Avg Relative Error','Fontsize',12)
title('\it{Average Relative Error with Thresholding}','Fontsize',12)

subplot(3,2,4)
plot(Sparsity_Levels,OMP.AvgRelErrNT,'k')
%axis([0 Sparsity_Levels(end)]);
xlabel('Sparsity Level','Fontsize',12)
ylabel('Avg Relative Error','Fontsize',12)
title('\it{Average Relative Error without Thresholding}','Fontsize',12)

subplot(3,2,5)
plot(Sparsity_Levels,OMP.AvgNbrItr,'k')
%axis([0 Sparsity_Levels(end)]);
xlabel('Sparsity Level','Fontsize',12)
ylabel('Avg Number of Iterations','Fontsize',12)
title('\it{Average Number of Iterations per Sparsity Level}','Fontsize',12)

subplot(3,2,6)
plot(Sparsity_Levels,OMP.AvgTime,'k')
%axis([0 Sparsity_Levels(end)]);
xlabel('Sparsity Level','Fontsize',12)
ylabel('Average Recovery Time (seconds)','Fontsize',12)
title('\it{Average Recovery Time}','Fontsize',12)

% figure(2)
% 
% subplot(3,2,1)
% plot(Sparsity_Levels, AISS.AvgProbD(:,1),'k',Sparsity_Levels,AISS.AvgProbD(:,2),'b',Sparsity_Levels, AISS.AvgProbD(:,3),'r')
% %axis([0 Sparsity_Levels(end)]);
% xlabel('Sparsity Level','Fontsize',12)
% ylabel('Prob of True Detection','Fontsize',12)
% title('\it{Average Probability of True Detection AISS}','Fontsize',12)
% 
% subplot(3,2,2)
% plot(Sparsity_Levels,AISS.AvgProbFA(:,1),'k',Sparsity_Levels, AISS.AvgProbFA(:,2),'b',Sparsity_Levels, AISS.AvgProbFA(:,3),'r')
% %axis([0 Sparsity_Levels(end)]);
% xlabel('Sparsity Level','Fontsize',12)
% ylabel('Avg Prob of False Alarm','Fontsize',12)
% title('\it{Average Probability of False Alarm AISS}','Fontsize',12)
% 
% subplot(3,2,3)
% plot(Sparsity_Levels,AISS.AvgRelErr(:,1),'k',Sparsity_Levels, AISS.AvgRelErr(:,2),'b',Sparsity_Levels, AISS.AvgRelErr(:,3),'r')
% %axis([0 Sparsity_Levels(end)]);
% xlabel('Sparsity Level','Fontsize',12)
% ylabel('Avg Relative Error','Fontsize',12)
% title('\it{Average Relative Error with Thresholding}','Fontsize',12)
% 
% subplot(3,2,4)
% plot(Sparsity_Levels,AISS.AvgRelErrNT,'k')
% %axis([0 Sparsity_Levels(end)]);
% xlabel('Sparsity Level','Fontsize',12)
% ylabel('Avg Relative Error','Fontsize',12)
% title('\it{Average Relative Error without Thresholding}','Fontsize',12)
% 
% subplot(3,2,5)
% plot(Sparsity_Levels,AISS.AvgNbrItr,'k')
% %axis([0 Sparsity_Levels(end)]);
% xlabel('Sparsity Level','Fontsize',12)
% ylabel('Avg Number of Iterations','Fontsize',12)
% title('\it{Average Number of Iterations per Sparsity Level}','Fontsize',12)
% 
% subplot(3,2,6)
% plot(Sparsity_Levels,AISS.AvgTime,'k')
% %axis([0 Sparsity_Levels(end)]);
% xlabel('Sparsity Level','Fontsize',12)
% ylabel('Average Recovery Time (seconds)','Fontsize',12)
% title('\it{Average Recovery Time}','Fontsize',12)


figure(3)
subplot(3,2,1)
plot(Sparsity_Levels, L1SQNN.AvgProbD(:,1),'k',Sparsity_Levels,L1SQNN.AvgProbD(:,2),'b',Sparsity_Levels, L1SQNN.AvgProbD(:,3),'r')
%axis([0 Sparsity_Levels(end)]);
xlabel('Sparsity Level','Fontsize',12)
ylabel('Prob of True Detection','Fontsize',12)
title('\it{Average Probability of True Detection L1SQNN}','Fontsize',12)

subplot(3,2,2)
plot(Sparsity_Levels,L1SQNN.AvgProbFA(:,1),'k',Sparsity_Levels, L1SQNN.AvgProbFA(:,2),'b',Sparsity_Levels, L1SQNN.AvgProbFA(:,3),'r')
%axis([0 Sparsity_Levels(end)]);
xlabel('Sparsity Level','Fontsize',12)
ylabel('Avg Prob of False Alarm','Fontsize',12)
title('\it{Average Probability of False Alarm L1SQNN}','Fontsize',12)

subplot(3,2,3)
plot(Sparsity_Levels,L1SQNN.AvgRelErr(:,1),'k',Sparsity_Levels, L1SQNN.AvgRelErr(:,2),'b',Sparsity_Levels, L1SQNN.AvgRelErr(:,3),'r')
%axis([0 Sparsity_Levels(end)]);
xlabel('Sparsity Level','Fontsize',12)
ylabel('Avg Relative Error','Fontsize',12)
title('\it{Average Relative Error with Thresholding}','Fontsize',12)

subplot(3,2,4)
plot(Sparsity_Levels,L1SQNN.AvgRelErrNT,'k')
%axis([0 Sparsity_Levels(end)]);
xlabel('Sparsity Level','Fontsize',12)
ylabel('Avg Relative Error','Fontsize',12)
title('\it{Average Relative Error without Thresholding}','Fontsize',12)

subplot(3,2,5)
plot(Sparsity_Levels,L1SQNN.AvgNbrItr,'k')
%axis([0 Sparsity_Levels(end)]);
xlabel('Sparsity Level','Fontsize',12)
ylabel('Avg Number of Iterations','Fontsize',12)
title('\it{Average Number of Iterations per Sparsity Level}','Fontsize',12)

subplot(3,2,6)
plot(Sparsity_Levels,L1SQNN.AvgTime,'k')
%axis([0 Sparsity_Levels(end)]);
xlabel('Sparsity Level','Fontsize',12)
ylabel('Average Recovery Time (seconds)','Fontsize',12)
title('\it{Average Recovery Time}','Fontsize',12)

figure(4)
subplot(3,2,1)
plot(Sparsity_Levels, L1L2CNN.AvgProbD(:,1),'k',Sparsity_Levels,L1L2CNN.AvgProbD(:,2),'b',Sparsity_Levels, L1L2CNN.AvgProbD(:,3),'r')
%axis([0 Sparsity_Levels(end)]);
xlabel('Sparsity Level','Fontsize',12)
ylabel('Prob of True Detection','Fontsize',12)
title('\it{Average Probability of True Detection L1L2CNN}','Fontsize',12)

subplot(3,2,2)
plot(Sparsity_Levels,L1L2CNN.AvgProbFA(:,1),'k',Sparsity_Levels, L1L2CNN.AvgProbFA(:,2),'b',Sparsity_Levels, L1L2CNN.AvgProbFA(:,3),'r')
%axis([0 Sparsity_Levels(end)]);
xlabel('Sparsity Level','Fontsize',12)
ylabel('Avg Prob of False Alarm','Fontsize',12)
title('\it{Average Probability of False Alarm L1L2CNN}','Fontsize',12)

subplot(3,2,3)
plot(Sparsity_Levels,L1L2CNN.AvgRelErr(:,1),'k',Sparsity_Levels, L1L2CNN.AvgRelErr(:,2),'b',Sparsity_Levels, L1L2CNN.AvgRelErr(:,3),'r')
%axis([0 Sparsity_Levels(end)]);
xlabel('Sparsity Level','Fontsize',12)
ylabel('Avg Relative Error','Fontsize',12)
title('\it{Average Relative Error with Thresholding}','Fontsize',12)

subplot(3,2,4)
plot(Sparsity_Levels,L1L2CNN.AvgRelErrNT,'k')
%axis([0 Sparsity_Levels(end)]);
xlabel('Sparsity Level','Fontsize',12)
ylabel('Avg Relative Error','Fontsize',12)
title('\it{Average Relative Error without Thresholding}','Fontsize',12)

subplot(3,2,5)
plot(Sparsity_Levels,L1L2CNN.AvgNbrItr,'k')
%axis([0 Sparsity_Levels(end)]);
xlabel('Sparsity Level','Fontsize',12)
ylabel('Avg Number of Iterations','Fontsize',12)
title('\it{Average Number of Iterations per Sparsity Level}','Fontsize',12)

subplot(3,2,6)
plot(Sparsity_Levels,L1L2CNN.AvgTime,'k')
%axis([0 Sparsity_Levels(end)]);
xlabel('Sparsity Level','Fontsize',12)
ylabel('Average Recovery Time (seconds)','Fontsize',12)
title('\it{Average Recovery Time}','Fontsize',12)


figure(5)
subplot(3,2,1)
plot(Sparsity_Levels, OMP.AvgProbD(:,1),'k',Sparsity_Levels, Sparsity_Levels, L1SQNN.AvgProbD(:,1),'r',Sparsity_Levels, L1L2CNN.AvgProbD(:,1),'g')
%axis([0 Sparsity_Levels(end)]);
xlabel('Sparsity Level','Fontsize',12)
ylabel('Prob of True Detection','Fontsize',12)
title('\it{Average Probability of True Detection L1SQNN}','Fontsize',12)

subplot(3,2,2)
plot(Sparsity_Levels,OMP.AvgProbFA(:,1),'k',Sparsity_Levels, Sparsity_Levels, L1SQNN.AvgProbFA(:,1),'r',Sparsity_Levels, L1L2CNN.AvgProbFA(:,1),'g')
%axis([0 Sparsity_Levels(end)]);
xlabel('Sparsity Level','Fontsize',12)
ylabel('Avg Prob of False Alarm','Fontsize',12)
title('\it{Average Probability of False Alarm L1SQNN}','Fontsize',12)

subplot(3,2,3)
plot(Sparsity_Levels,OMP.AvgRelErr(:,1),'k',Sparsity_Levels, Sparsity_Levels, L1SQNN.AvgRelErr(:,1),'r',Sparsity_Levels, L1L2CNN.AvgRelErr(:,1),'g')
%axis([0 Sparsity_Levels(end)]);
xlabel('Sparsity Level','Fontsize',12)
ylabel('Avg Relative Error','Fontsize',12)
title('\it{Average Relative Error with Thresholding}','Fontsize',12)

subplot(3,2,4)
plot(Sparsity_Levels,OMP.AvgRelErrNT,'k', Sparsity_Levels, Sparsity_Levels, L1SQNN.AvgRelErrNT,'r',Sparsity_Levels, L1L2CNN.AvgRelErrNT,'g')
%axis([0 Sparsity_Levels(end)]);
xlabel('Sparsity Level','Fontsize',12)
ylabel('Avg Relative Error','Fontsize',12)
title('\it{Average Relative Error without Thresholding}','Fontsize',12)

subplot(3,2,5)
plot(Sparsity_Levels,OMP.AvgNbrItr,'k',Sparsity_Levels,Sparsity_Levels, L1SQNN.AvgNbrItr,'r',Sparsity_Levels, L1L2CNN.AvgNbrItr,'g')
%axis([0 Sparsity_Levels(end)]);
xlabel('Sparsity Level','Fontsize',12)
ylabel('Avg Number of Iterations','Fontsize',12)
title('\it{Average Number of Iterations per Sparsity Level}','Fontsize',12)

subplot(3,2,6)
plot(Sparsity_Levels,OMP.AvgTime,'k',Sparsity_Levels,Sparsity_Levels, L1SQNN.AvgTime,'r',Sparsity_Levels, L1L2CNN.AvgTime,'g')
%axis([0 Sparsity_Levels(end)]);
xlabel('Sparsity Level','Fontsize',12)
ylabel('Average Recovery Time (seconds)','Fontsize',12)
title('\it{Average Recovery Time}','Fontsize',12)
