# Supplementary material for: Compressed Sensing in On-Grid MIMO Radar
Source: ScientificWorldJournal. 2015 Sep 30;2015:397878. doi: 10.1155/2015/397878 (PMC4870333; doi:10.1155/2015/397878)
Supplement: Supplementary file 1 — The Supplementary Material accompanying this paper is a TAR file containing the MATLAB files needed to reproduce the results of the paper. These include the exact code used in each experiment, the resulting data sets from each experiment, and the code to generate the plots for each of these data sets. [file 397878.f1.tar › MFM_Radar_Reproducibles-2015-08-21/MFM_Radar_Reproducibles/Experiments/Experiment_4.m]

%% Experiment 4
% %% Uses structure objects

% Compressed Sensing in On-Grid MIMO Radar
% Test Simulations, SNR = varying Levels (15,20,25,30,50,Inf dB)
% Random array
% L1 Square Non Negative Regularization
% Families of ROC Curves for L1SQNN as parameter lambda varies [depends on SNR level]
% Size of the problem is 500*1000

% Michael F Minner

%% Clear
clear all;

%% Simulation information

% For each sparsity level, generate N_S signals, N_M matrices
Sparsity_Levels=1:15;

N_S=20;N_A=20;N_ss=size(Sparsity_Levels,2);  % Number of signals, random arrays, sparsity levels
N_Sim=N_S*N_A;                               % Number of simulations for each sparsity level

threshold=[0.0,0.0001,0.001,0.01,0.1,0.2,0.3,0.4,0.5,0.6,0.7,.8,0.9,.99,.999];    % Consider different threshold levels for detection
N_thresh=size(threshold,2);                  % Number of thresholds considered

SNR=Inf;                                      % Signal to Noise Ratio in dB
N_snr=size(SNR,2);                           % Number of Signal to Noise Ratios

%Originally 30dB [10, 20, 30, 50, 70]
%Par_L1SQ=[10, 15, 20, 25, 30];            % Consider different parameter values for lambda
%15dB [1,2,5,8,10]
%20dB [3,5,7,9,11]
%25dB [6,8,10,12,14]
%30dB [9,12,15,18,21]
%50dB [10,14,18,22,26]
%InfdB [10,15,20,25,30]
Par_L1SQ=[10,15,20,25,30];
N_par=size(Par_L1SQ,2);                      % Number of Parameter values

% Average of the probabilities of detection
% and false alarms for each threshold level
% Average relative error with thresholding
% Average relative error without thresholding
% Average time to evaluate OMP
% Average number of iterations for OMP

L1SQNNR.AvgProbD=zeros(N_ss,N_thresh, N_par);       % Random Array
L1SQNNR.AvgProbFA=zeros(N_ss,N_thresh, N_par);
L1SQNNR.AvgRelErr=zeros(N_ss,N_thresh, N_par);
L1SQNNR.AvgRelErrS=zeros(N_ss,N_thresh, N_par);
L1SQNNR.AvgTime=zeros(N_ss, 1, N_par);
L1SQNNR.AvgNbrItr=zeros(N_ss, 1, N_par);

L1SQNNR_ProbD=zeros(N_Sim,N_thresh, N_par);
L1SQNNR_ProbFA=zeros(N_Sim,N_thresh, N_par);
L1SQNNR_RelErr=zeros(N_Sim,N_thresh, N_par);
L1SQNNR_RelErrS=zeros(N_Sim,N_thresh, N_par);
L1SQNNR_Time=zeros(N_Sim, 1, N_par);
L1SQNNR_NbrItr=zeros(N_Sim, 1, N_par);


% each row is a separate simulation,
% each column is a different threshold
% each set of rows and columns corresponds to a different SNR level.

fname=(['Experiment_4_SNR_', num2str(SNR(1)),'_par_',num2str(Par_L1SQ(1)), '_to_', num2str(Par_L1SQ(end)),'.mat']);

%% Initialization

M=5;         % # of Transmitters
N=5;         % # of Receivers.
Q=20;         % # of samples

U=10;         % # of Azimuth Bins
V=10;         % # of Range Bins
W=10;         % # of Doppler Bins

K=U*V*W;      % total # of Bins

c=3e8;             % speed of light

B=15e6;            % Bandwidth of each transmitted signal 15MHz
T=2e-6;            % Waveform pulse duration
f_c=1e10;          % Carrier frequency of the first transmitter 10GHz
lambda=c/f_c;      % Reference carrier wavelength, lambda = c/f_c
alpha=B/T;         % Chirp rate, alpha=B/T

Range_U=[-.1,.1];                 % range of angles (-.1 to .1) in radians
Range_V=[990,1010];               % range of distances in meters (980 to 1020 meters)
Range_W=[0,30];                   % range of speeds (0 to 30 meters per second)

Range_tau=2.*Range_V./c;          % range of time delays
Range_upsilon=2/lambda.*Range_W;  % range of Doppler shifts

Delta_U=(Range_U(2)-Range_U(1))/U;      % step size in each domain
Delta_V=(Range_V(2)-Range_V(1))/V;
Delta_W=(Range_W(2)-Range_W(1))/W;

Delta_tau=(Range_tau(2)-Range_tau(1))/V;
Delta_upsilon=(Range_upsilon(2)-Range_upsilon(1))/W;

Values_U=Range_U(1):Delta_U:Range_U(2)-Delta_U; % values for each bin
Values_V=Range_V(1):Delta_V:Range_V(2)-Delta_V; % remove additional final bin
Values_W=Range_W(1):Delta_W:Range_W(2)-Delta_W;

Values_tau=Range_tau(1):Delta_tau:Range_tau(2)-Delta_tau;
Values_upsilon=Range_upsilon(1):Delta_upsilon:Range_upsilon(2)-Delta_upsilon;

% Sample in time only for targets in the scene...
T_d=Range_tau(2)-Range_tau(1);  % Sample time duration
Delta_Q=T_d/Q;                  % Sample times
Values_T_d=Range_tau(1):Delta_Q:Range_tau(2)-Delta_Q;

%% Simulations

timeStart=tic;
index1=1; % Index for the total number of simulations performed

index4=1; % Index for sparsity

for ss=Sparsity_Levels   % Vary the sparsity level
    
    index2=1; % Index for number of simulations per sparsity
    
    % Calculations for measurement matrices
    [~, weight,A_F, A_G, A_H] = LinearChirp( M,Q,V,W,alpha,T,f_c,Values_tau, Values_upsilon, Values_T_d );
    
    for ii=1:N_A          % The number of matrices to generate
        
        % Random Antenna Locations
        [ p1,q1 ] = AntennaPositionRandom(M,N);
        
        
        % Build Antenna Arrays
        [A_T1,A_R1] = AntennaArray( p1,q1,lambda, M,N,U,Values_U);
        
        % Measurement Matrices
        [ A1 ] = MeasurementMatrixVectorized(A_R1, A_T1, A_F, A_G, A_H, weight,M,N,Q,U,V,W,K);
        
        
        
        for kk=1:N_S  % The number of signals to generate
            
            %Mag=2;            % Magnitude of target reflectivities
            [signal, grid, supp] = TargetScene(ss,U,V,W,K);
            
            % All ones on the support
            signal(supp)=ones(ss,1);
            
            % Take Measurements
            y1=A1*signal;
            
            % Complex separation
            x=[real(signal);imag(signal)];
            B1=[real(A1),-imag(A1);imag(A1),real(A1)];
            z1=B1*x;
            
            
            % Signal Power
            PowerSignal=norm(signal(supp)).^2;
            snr=SNR;
            index5=1;
            for parameter=Par_L1SQ
                
                if snr==Inf
                    % No noise
                    tStartL1SQNNR=tic;
                    display(['current parameter: ' num2str(parameter)])
                    [xL1SQNNR,~,~,NbrItrL1SQNNR] = l1sqnnreg(z1,B1,parameter);
                    L1SQNNR_Time(index2,1,index5)=toc(tStartL1SQNNR);
                    L1SQNNR_NbrItr(index2,1,index5)=NbrItrL1SQNNR;
                    xL1SQNNR=xL1SQNNR(1:K)+1i.*xL1SQNNR(K+1,end);
                    xL1SQNNR_Abs=abs(xL1SQNNR);
                    
                else
                    % Generate Noise
                    
                    NoiseStdDev=sqrt(PowerSignal/(2*M*N*Q*power(10,snr/10)));                % Standard deviation of the noise
                    noise=NoiseStdDev.*randn(M*N*Q,1)+NoiseStdDev*1i.*randn(M*N*Q,1);        % Complex Gaussian noise
                    
                    %noisey measurments
                    y1N=y1+noise;
                    z1N=[real(y1N);imag(y1N)];
                    
                    % Recovery
                    
                    % L1SQNN
                    tStartL1SQNNR=tic;
                    display(['current parameter: ' num2str(parameter)])
                    [xL1SQNNR,~,~,NbrItrL1SQNNR] = l1sqnnreg(z1N,B1,parameter);
                    L1SQNNR_Time(index2,1,index5)=toc(tStartL1SQNNR);
                    L1SQNNR_NbrItr(index2,1,index5)=NbrItrL1SQNNR;
                    xL1SQNNR=xL1SQNNR(1:K)+1i.*xL1SQNNR(K+1,end);
                    xL1SQNNR_Abs=abs(xL1SQNNR);
                end
                
                index3=1;
                for t=threshold
                    
                    Removed_L1SQNNR=find(xL1SQNNR_Abs<t);
                    xL1SQNNR(Removed_L1SQNNR)=0;
                    xL1SQNNR_Abs(Removed_L1SQNNR)=0;
                    SuppL1SQNNR=find(xL1SQNNR_Abs>=t);
                    L1SQNNR_RelErr(index2,index3,index5)=norm(xL1SQNNR-signal)/sqrt(PowerSignal);
                    L1SQNNR_ProbD(index2,index3,index5)=sum(xL1SQNNR_Abs(supp,1)>=t)/ss;
                    L1SQNNR_ProbFA(index2,index3,index5)=sum(xL1SQNNR_Abs(setdiff(SuppL1SQNNR,supp),1)>=t)/(K-ss);
                    L1SQNNR_RelErrS(index2,index3,index5)=norm(xL1SQNNR(supp)-signal(supp))/sqrt(PowerSignal);
                    
                    index3=index3+1;
                end
                
                index5=index5+1;
                
                
            end
            display(['current sparsity: ' num2str(ss) ' current simulation: ' num2str(index2)])
            index2=index2+1;
            index1=index1+1;
        end
    end
    
    
    L1SQNNR.AvgProbD(index4,:,:)=mean(L1SQNNR_ProbD,1);
    L1SQNNR.AvgProbFA(index4,:,:)=mean(L1SQNNR_ProbFA,1);
    L1SQNNR.AvgRelErr(index4,:,:)=mean(L1SQNNR_RelErr,1);
    L1SQNNR.AvgRelErrS(index4,:,:)=mean(L1SQNNR_RelErrS,1);
    L1SQNNR.AvgTime(index4,1,:)=mean(L1SQNNR_Time,1);
    L1SQNNR.AvgNbrItr(index4,1,:)=mean(L1SQNNR_NbrItr,1);
    
    index4=index4+1;
    
    save(fname, 'L1SQNNR' ,'Sparsity_Levels','Par_L1SQ' ,'index1', 'index4', 'M', 'N', 'Q', 'U', 'V', 'W', 'K', 'SNR', 'Range_U', 'Range_V', 'Range_W');
    
end

timeStop=toc(timeStart)
