# Supplementary material for: Compressed Sensing in On-Grid MIMO Radar
Source: ScientificWorldJournal. 2015 Sep 30;2015:397878. doi: 10.1155/2015/397878 (PMC4870333; doi:10.1155/2015/397878)
Supplement: Supplementary file 1 — The Supplementary Material accompanying this paper is a TAR file containing the MATLAB files needed to reproduce the results of the paper. These include the exact code used in each experiment, the resulting data sets from each experiment, and the code to generate the plots for each of these data sets. [file 397878.f1.tar › MFM_Radar_Reproducibles-2015-08-21/MFM_Radar_Reproducibles/Experiments/Experiment_6.m]

%% Experiment 6
% %% Uses structure objects

% Compressed Sensing in On-Grid MIMO Radar
% Test Simulations, SNR = 30 dB
% Random array
% L1 Square Non Negative Regularization
% ROC Curves for L1SQNN as sparsity varies at different Bandwidths
% Size of the problem is 500*1000
% Sparsity [4, 6, 8, 10, 12]

% Analyze different threshold levels [0.0,0.0001,0.001,0.01,0.1,0.2,0.3,0.4,0.5,0.6,0.7,.8,0.9,.99,.999]

% Consider different values of Bandwidth [10 MHz 15 MHz 20 MHz 22 MHz 25 MHz 27 MHz 30 MHz 35 MHz] 

% Michael F Minner

%% Clear
clear all;

%% Simulation information

% For each sparsity level, generate N_S signals, N_M matrices
%Sparsity_Levels=[1,2,3,4,5,6,7,8,9,10,11,12,13,14,15,20];
Sparsity_Levels=[4,6,8,10,12];
%N_S=40;N_A=25;N_ss=size(Sparsity_Levels,2);  % Number of signals, random arrays, sparsity levels
N_S=20;N_A=25;N_ss=size(Sparsity_Levels,2);
N_Sim=N_S*N_A;                               % Number of simulations for each sparsity level

threshold=[0.0,0.0001,0.001,0.01,0.1,0.2,0.3,0.4,0.5,0.6,0.7,.8,0.9,.99,.999];                     % Consider different threshold levels for detection
N_thresh=size(threshold,2);                  % Number of thresholds considered

SNR=30;                                      % Signal to Noise Ratio in dB
N_snr=size(SNR,2);                           % Number of Signal to Noise Ratios

B=[10e6 15e6 20e6 22e6 25e6 27e6 30e6 35e6]; % Bandwidths to consider

N_Band=size(B,2);

Par_L1SQ=15;                                 % Parameter for reconstruction

% Average of the probabilities of detection
% and false alarms for each threshold level
% Average relative error with thresholding
% Average relative error without thresholding
% Average time to evaluate OMP
% Average number of iterations for OMP

L1SQNNR.AvgProbD=zeros(N_ss,N_thresh, N_Band);       % Random Array
L1SQNNR.AvgProbFA=zeros(N_ss,N_thresh, N_Band);
L1SQNNR.AvgRelErr=zeros(N_ss,N_thresh, N_Band);
L1SQNNR.AvgRelErrS=zeros(N_ss,N_thresh, N_Band);
L1SQNNR.AvgTime=zeros(N_ss, 1, N_Band);
L1SQNNR.AvgNbrItr=zeros(N_ss, 1, N_Band);

L1SQNNR_ProbD=zeros(N_Sim,N_thresh);
L1SQNNR_ProbFA=zeros(N_Sim,N_thresh);
L1SQNNR_RelErr=zeros(N_Sim,N_thresh);
L1SQNNR_RelErrS=zeros(N_Sim,N_thresh);
L1SQNNR_Time=zeros(N_Sim, 1);
L1SQNNR_NbrItr=zeros(N_Sim, 1);


% each row is a separate simulation,
% each column is a different threshold
% each set of rows and columns corresponds to a different SNR level.

fname=(['Updated_Experiment_6_Bandwidth_', num2str(B(1)), '_to_', num2str(B(end)),'_ThreshNbr_', num2str(N_snr),'.mat']);

%% Initialization

M=5;         % # of Transmitters
N=5;         % # of Receivers.
Q=20;         % # of samples

U=10;         % # of Azimuth Bins
V=10;         % # of Range Bins
W=10;         % # of Doppler Bins

K=U*V*W;      % total # of Bins

c=3e8;             % speed of light

T=2e-6;            % Waveform pulse duration
f_c=1e10;          % Carrier frequency of the first transmitter 10GHz
lambda=c/f_c;      % Reference carrier wavelength, lambda = c/f_c
alpha=B./T;         % Chirp rate, alpha=B/T

Range_U=[-.1,.1];                 % range of angles (-.1 to .1) in radians
Range_V=[990,1010];               % range of distances in meters (980 to 1020 meters)
Range_W=[0,30];                   % range of speeds (0 to 30 meters per second)

Range_tau=2.*Range_V./c;          % range of time delays
Range_upsilon=2/lambda.*Range_W;  % range of Doppler shifts

Delta_U=(Range_U(2)-Range_U(1))/U;      % step size in each domain
Delta_V=(Range_V(2)-Range_V(1))/V;
Delta_W=(Range_W(2)-Range_W(1))/W;

Delta_tau=(Range_tau(2)-Range_tau(1))/V;
Delta_upsilon=(Range_upsilon(2)-Range_upsilon(1))/W;

Values_U=Range_U(1):Delta_U:Range_U(2)-Delta_U; % values for each bin
Values_V=Range_V(1):Delta_V:Range_V(2)-Delta_V; % remove additional final bin
Values_W=Range_W(1):Delta_W:Range_W(2)-Delta_W;

Values_tau=Range_tau(1):Delta_tau:Range_tau(2)-Delta_tau;
Values_upsilon=Range_upsilon(1):Delta_upsilon:Range_upsilon(2)-Delta_upsilon;

% Sample in time only for targets in the scene...
T_d=Range_tau(2)-Range_tau(1);  % Sample time duration
Delta_Q=T_d/Q;                  % Sample times
Values_T_d=Range_tau(1):Delta_Q:Range_tau(2)-Delta_Q;

%%
timeStart=tic;
index1=1; % Index for the total number of simulations performed
index5=1;
for aa=alpha  % Vary the Bandwidth
    
    index4=1;
    for ss=Sparsity_Levels   % Vary the sparsity level
        
        index2=1; % Index for number of simulations per sparsity
        
        for ii=1:N_A          % The number of matrices to generate
            
            % Random Antenna Locations
            [ p1,q1 ] = AntennaPositionRandom(M,N);
            
            % Build Antenna Arrays
            [A_T1,A_R1] = AntennaArray( p1,q1,lambda, M,N,U,Values_U);
            
            % Measurement Matrices
            [~, weight,A_F, A_G, A_H] = LinearChirp( M,Q,V,W,aa,T,f_c,Values_tau, Values_upsilon, Values_T_d );
            [ A1 ] = MeasurementMatrixVectorized(A_R1, A_T1, A_F, A_G, A_H, weight,M,N,Q,U,V,W,K);
            
            for kk=1:N_S  % The number of signals to generate
                
                %Mag=2;            % Magnitude of target reflectivities
                [signal, grid, supp] = TargetScene(ss,U,V,W,K);
                
                % All ones on the support
                signal(supp)=ones(ss,1);
                
                % Take Measurements
                y1=A1*signal;
                
                % Complex separation
                x=[real(signal);imag(signal)];
                B1=[real(A1),-imag(A1);imag(A1),real(A1)];
                z1=B1*x;
                
                % Signal Power
                PowerSignal=norm(signal(supp)).^2;
                snr=SNR;
                
                if snr==Inf
                    
                    tStartL1SQNNR=tic;
                    %display(['current SNR: ' num2str(snr)])
                    [xL1SQNNR,~,~,NbrItrL1SQNNR] = l1sqnnreg(z1,B1,Par_L1SQ);
                    L1SQNNR_Time(index2,1)=toc(tStartL1SQNNR);
                    L1SQNNR_NbrItr(index2,1)=NbrItrL1SQNNR;
                    xL1SQNNR=xL1SQNNR(1:K)+1i.*xL1SQNNR(K+1,end);
                    %L1SQNNR_RelErrNT(index2,1,index5)=norm(xL1SQNNR-signal)/sqrt(PowerSignal);
                    xL1SQNNR_Abs=abs(xL1SQNNR);
                    
                else
                    % Generate Noise
                    
                    NoiseStdDev=sqrt(PowerSignal/(2*M*N*Q*power(10,snr/10)));                % Standard deviation of the noise
                    noise=NoiseStdDev.*randn(M*N*Q,1)+NoiseStdDev*1i.*randn(M*N*Q,1);        % Complex Gaussian noise
                    
                    %noisey measurments
                    y1N=y1+noise;
                    z1N=[real(y1N);imag(y1N)];
                    
                    % Recovery
                    
                    % L1SQNN
                    tStartL1SQNNR=tic;
                    %display(['current SNR: ' num2str(snr)])
                    [xL1SQNNR,~,~,NbrItrL1SQNNR] = l1sqnnreg(z1N,B1,Par_L1SQ);
                    L1SQNNR_Time(index2,1)=toc(tStartL1SQNNR);
                    L1SQNNR_NbrItr(index2,1)=NbrItrL1SQNNR;
                    xL1SQNNR=xL1SQNNR(1:K)+1i.*xL1SQNNR(K+1,end);
                    %L1SQNNR_RelErrNT(index2,1,index5)=norm(xL1SQNNR-signal)/sqrt(PowerSignal);
                    
                    xL1SQNNR_Abs=abs(xL1SQNNR);
                end
                
                index3=1;
                for t=threshold
                    
                    Removed_L1SQNNR=find(xL1SQNNR_Abs<=t);
                    xL1SQNNR(Removed_L1SQNNR)=0;
                    xL1SQNNR_Abs(Removed_L1SQNNR)=0;
                    SuppL1SQNNR=find(xL1SQNNR_Abs>t);
                    L1SQNNR_RelErr(index2,index3)=norm(xL1SQNNR-signal)/sqrt(PowerSignal);
                    L1SQNNR_ProbD(index2,index3)=sum(xL1SQNNR_Abs(supp,1)>=t)/ss;
                    L1SQNNR_ProbFA(index2,index3)=sum(xL1SQNNR_Abs(setdiff(SuppL1SQNNR,supp),1)>=t)/(K-ss);
                    L1SQNNR_RelErrS(index2,index3)=norm(xL1SQNNR(supp)-signal(supp))/sqrt(PowerSignal);
                    index3=index3+1;
                end
                
                display(['current bandwidth: ' num2str(B(index5)) ' sparsity: ' num2str(ss) ' simulation: ' num2str(index2)])
                index2=index2+1;
                index1=index1+1;
                
            end
            
        end
        
        
        L1SQNNR.AvgProbD(index4,:,index5)=mean(L1SQNNR_ProbD,1);
        L1SQNNR.AvgProbFA(index4,:,index5)=mean(L1SQNNR_ProbFA,1);
        L1SQNNR.AvgRelErr(index4,:,index5)=mean(L1SQNNR_RelErr,1);
        %L1SQNNR.AvgRelErrNT(index4,1,:)=mean(L1SQNNR_RelErrNT,1);
        L1SQNNR.AvgRelErrS(index4,:,index5)=mean(L1SQNNR_RelErrS,1);
        L1SQNNR.AvgTime(index4,1,index5)=mean(L1SQNNR_Time,1);
        L1SQNNR.AvgNbrItr(index4,1,index5)=mean(L1SQNNR_NbrItr,1);
        
        index4=index4+1;
    end
    index5=index5+1;
    
    save(fname, 'L1SQNNR' ,'B', 'Sparsity_Levels','Par_L1SQ' ,'index1', 'index4', 'M', 'N', 'Q', 'U', 'V', 'W', 'K', 'SNR', 'Range_U', 'Range_V', 'Range_W');
    
end

timeStop=toc(timeStart)
