# Supplementary material for: Compressed Sensing in On-Grid MIMO Radar
Source: ScientificWorldJournal. 2015 Sep 30;2015:397878. doi: 10.1155/2015/397878 (PMC4870333; doi:10.1155/2015/397878)
Supplement: Supplementary file 1 — The Supplementary Material accompanying this paper is a TAR file containing the MATLAB files needed to reproduce the results of the paper. These include the exact code used in each experiment, the resulting data sets from each experiment, and the code to generate the plots for each of these data sets. [file 397878.f1.tar › MFM_Radar_Reproducibles-2015-08-21/MFM_Radar_Reproducibles/Experiments/l1sqnnregM.m]

% L1SQNNREG L1-squared nonnegative regularization
% l1sqnnreg(y,A,lambda) finds the solution of
% minimize ||z||_1^2+lambda^2*||Az-y||_2^2 subject to z >= 0
% Usage: [x,Normx,NormRes,NbOuterIter] = l1sqnnreg(y,A,lambda)
% y: column vector, A: matrix, lambda: (large) positive number
% x: column vector (solution of the regularization)
% Normx: the L1-norm of x (i.e., ||x||_1)
% NormRes: the L2-norm of the residual (i.e., ||Ax-y||_2)
% NbOuterIter: number of iterations (not including the inner loop)
% Simon Foucart (created 23 Aug 2013, modified 29 August 2013)

% Modified to use fewer iterations in lsqnoneg

function [x,Normx,NormRes,NbOuterIter] = l1sqnnregM(y,A,lambda)

[~,N]=size(A);
Aaux=[ones(1,N);lambda*A];
yaux=[0;lambda*y];
[x,~,~,~,output]=lsqnonnegM(Aaux,yaux);
Normx=sum(x);
NormRes=norm(A*x-y);
NbOuterIter=output.iterations;

end
