# Supplementary material for: Compressed Sensing in On-Grid MIMO Radar
Source: ScientificWorldJournal. 2015 Sep 30;2015:397878. doi: 10.1155/2015/397878 (PMC4870333; doi:10.1155/2015/397878)
Supplement: Supplementary file 1 — The Supplementary Material accompanying this paper is a TAR file containing the MATLAB files needed to reproduce the results of the paper. These include the exact code used in each experiment, the resulting data sets from each experiment, and the code to generate the plots for each of these data sets. [file 397878.f1.tar › MFM_Radar_Reproducibles-2015-08-21/MFM_Radar_Reproducibles/Experiments/LinearChirp.m]

function [ chirp1, weight, A_F, A_G, A_H ] = LinearChirp( M,Q,V,W,alpha,T,f_c,Values_tau, Values_upsilon, Values_T_d )
% Create Matrix to store linear chirps
% the entry of chirp(m,q)=s_m(t_q)
% Also create matrices for measurement matrix
% For Angle, Delay and Doppler without vectorization
% Michael F Minner


chirp1 = zeros(M,Q);       % Store LFM chirps
A_F = zeros(M,V);          % Values needed for measurement matrix
A_G = zeros(Q,V);
A_H = zeros(Q,W);

t= Values_T_d;             % values of t_q'

f_m = f_c+alpha*T;         % values of f_m = f_c+m*alpha*T

weight=ones(M,1);          % no weights
                           % values of tau_k - tau_0
Values_tau_shifted=Values_tau-Values_tau(1);

for m=1:M
    chirp1(m,:) = exp(1i*2*pi*(.5*alpha.*t.^2+f_m.*t));
    A_F(m,:)=exp(-1i*2*pi*f_m.*Values_tau_shifted);
    f_m = f_m+alpha*T;
end

for q=1:Q
    A_G(q,:) = exp(-1i*2*pi*alpha*t(q).*Values_tau_shifted);
    A_H(q,:) = exp(-1i*2*pi*(t(q)+Values_tau(1)).*Values_upsilon);
end

 
end
