# Supplementary material for: Compressed Sensing in On-Grid MIMO Radar
Source: ScientificWorldJournal. 2015 Sep 30;2015:397878. doi: 10.1155/2015/397878 (PMC4870333; doi:10.1155/2015/397878)
Supplement: Supplementary file 1 — The Supplementary Material accompanying this paper is a TAR file containing the MATLAB files needed to reproduce the results of the paper. These include the exact code used in each experiment, the resulting data sets from each experiment, and the code to generate the plots for each of these data sets. [file 397878.f1.tar › MFM_Radar_Reproducibles-2015-08-21/MFM_Radar_Reproducibles/Experiments/lsqnonnegM.m]

function [x,resnorm,resid,exitflag,output,lambda] = lsqnonnegM(C,d,options,varargin)
%LSQNONNEG Linear least squares with nonnegativity constraints.
%   X = LSQNONNEG(C,d) returns the vector X that minimizes NORM(d-C*X)
%   subject to X >= 0. C and d must be real.
%
%   X = LSQNONNEG(C,d,OPTIONS) minimizes with the default optimization
%   parameters replaced by values in the structure OPTIONS, an argument
%   created with the OPTIMSET function.  See OPTIMSET for details. Used
%   options are Display and TolX. (A default tolerance TolX of 
%   10*MAX(SIZE(C))*NORM(C,1)*EPS is used.) 
%   
%   X = LSQNONNEG(PROBLEM) finds the minimum for PROBLEM. PROBLEM is a
%   structure with the matrix 'C' in PROBLEM.C, the vector 'd' in
%   PROBLEM.d, the options structure in PROBLEM.options, and solver name
%   'lsqnonneg' in PROBLEM.solver. The structure PROBLEM must have all the
%   fields. 
%
%   [X,RESNORM] = LSQNONNEG(...) also returns the value of the squared 2-norm of 
%   the residual: norm(d-C*X)^2.
%
%   [X,RESNORM,RESIDUAL] = LSQNONNEG(...) also returns the value of the  
%   residual: d-C*X.
%   
%   [X,RESNORM,RESIDUAL,EXITFLAG] = LSQNONNEG(...) returns an EXITFLAG that 
%   describes the exit condition of LSQNONNEG. Possible values of EXITFLAG and
%   the corresponding exit conditions are
%
%    1  LSQNONNEG converged with a solution X.
%    0  Iteration count was exceeded. Increasing the tolerance
%       (OPTIONS.TolX) may lead to a solution.
%  
%   [X,RESNORM,RESIDUAL,EXITFLAG,OUTPUT] = LSQNONNEG(...) returns a structure
%   OUTPUT with the number of steps taken in OUTPUT.iterations, the type of 
%   algorithm used in OUTPUT.algorithm, and the exit message in OUTPUT.message.
%
%   [X,RESNORM,RESIDUAL,EXITFLAG,OUTPUT,LAMBDA] = LSQNONNEG(...) returns 
%   the dual vector LAMBDA  where LAMBDA(i) <= 0 when X(i) is (approximately) 0 
%   and LAMBDA(i) is (approximately) 0 when X(i) > 0.
% 
%   See also LSCOV, SLASH.

%   Copyright 1984-2012 The MathWorks, Inc. 
%   $Revision: 1.1.6.3 $  $Date: 2012/08/21 00:30:38 $

% Reference:
%  Lawson and Hanson, "Solving Least Squares Problems", Prentice-Hall, 1974.

% Check if more inputs have been passed. In that case error.
if nargin > 4
    error(message('MATLAB:lsqnonneg:TooManyInputs'));
end

defaultopt = struct('Display','notify','TolX','10*eps*norm(C,1)*length(C)');
% If just 'defaults' passed in, return the default options in X
if nargin == 1 && nargout <= 1 && isequal(C,'defaults')
    x = defaultopt;
    return
end

% Detect problem structure input
if nargin == 1
    if isa(C,'struct')
        [C,d,options] = separateOptimStruct(C);
    else % Single input and non-structure.
        error(message('MATLAB:lsqnonneg:InputArg'));
    end
end

if nargin == 0
    error(message('MATLAB:lsqnonneg:NotEnoughInputs'));
end

if ~isreal(C) || ~isreal(d),
    error(message('MATLAB:lsqnonneg:ComplexCorD'));
end

% Check for non-double inputs
if ~isa(C,'double') || ~isa(d,'double')
    error(message('MATLAB:lsqnonneg:NonDoubleInput'))
end

if nargin > 2
    % Check for deprecated syntax
    options = deprecateX0(options,nargin,varargin{:});
else
    % No options passed, set to empty
    options = [];
end

printtype = optimget(options,'Display',defaultopt,'fast');
tol = optimget(options,'TolX',defaultopt,'fast');

% In case the defaults were gathered from calling: optimset('lsqnonneg'):
if ischar(tol)
    if strcmpi(tol,'10*eps*norm(c,1)*length(c)')
        tol = 10*eps*norm(C,1)*length(C);
    else
        error(message('MATLAB:lsqnonneg:OptTolXNotPosScalar'))
    end
end

switch printtype
    case {'notify','notify-detailed'}
        verbosity = 1;
    case {'none','off'}
        verbosity = 0;
    case {'iter','iter-detailed'}
        warning(message('MATLAB:lsqnonneg:InvalidDisplayValueIter'))
        verbosity = 3;
    case {'final','final-detailed'}
        verbosity = 2;
    otherwise
        error(message('MATLAB:lsqnonneg:InvalidOptParamDisplay'));
end

n = size(C,2);
% Initialize vector of n zeros and Infs (to be used later)
nZeros = zeros(n,1);
wz = nZeros;

% Initialize set of non-active columns to null
P = false(n,1);
% Initialize set of active columns to all and the initial point to zeros
Z = true(n,1);
x = nZeros;

resid = d - C*x;
w = C'*resid;

% Set up iteration criterion
outeriter = 0;
iter = 0;
itmax = n+1;
exitflag = 1;

% Outer loop to put variables into set to hold positive coefficients
while any(Z) && any(w(Z) > tol)
   outeriter = outeriter + 1;
   % Reset intermediate solution z
   z = nZeros; 
   % Create wz, a Lagrange multiplier vector of variables in the zero set.
   % wz must have the same size as w to preserve the correct indices, so
   % set multipliers to -Inf for variables outside of the zero set.
   wz(P) = -Inf;
   wz(Z) = w(Z);
   % Find variable with largest Lagrange multiplier
   [~,t] = max(wz);
   % Move variable t from zero set to positive set
   P(t) = true;
   Z(t) = false;
   % Compute intermediate solution using only variables in positive set
   z(P) = C(:,P)\d;
   % inner loop to remove elements from the positive set which no longer belong
   while any(z(P) <= 0)
       iter = iter + 1;
       if iter > itmax
           msg = getString(message('MATLAB:lsqnonneg:IterationCountExceeded'));
           if verbosity
               disp(msg)
           end
           exitflag = 0;
           output.iterations = outeriter;
           output.message = msg;
           output.algorithm = 'active-set';
           resnorm = sum(resid.*resid);
           x = z;
           lambda = w;
           return
       end
       % Find indices where intermediate solution z is approximately negative
       Q = (z <= 0) & P;
       % Choose new x subject to keeping new x nonnegative
       alpha = min(x(Q)./(x(Q) - z(Q)));
       x = x + alpha*(z - x);
       % Reset Z and P given intermediate values of x
       Z = ((abs(x) < tol) & P) | Z;
       P = ~Z;
       z = nZeros;           % Reset z
       z(P) = C(:,P)\d;      % Re-solve for z
   end
   x = z;
   resid = d - C*x;
   w = C'*resid;
end

lambda = w;
resnorm = resid'*resid;
output.iterations = outeriter;
output.algorithm = 'active-set';
msg = getString(message('MATLAB:lsqnonneg:OptimizationTerminated'));
if verbosity > 1
    disp(msg)
end
output.message = msg;


%--------------------------------------------------------------------------
function options = deprecateX0(options,numInputs,varargin)
% Code to check if user has passed in x0. If so, ignore it and warn of its
% deprecation. Also check whether the options have been passed in either
% the 3rd or 4th input.
if numInputs == 4
    % 4 inputs given; the 3rd (variable name "options") will be interpreted
    % as x0, and the 4th as options
    if ~isempty(options)
        % x0 is non-empty
        warning(message('MATLAB:lsqnonneg:ignoringX0'));
    end
    % Take the 4th argument as the options
    options = varargin{1};
elseif numInputs == 3
    % Check if a non-empty or non-struct has been passed in for options
    % If so, assume that it's an attempt to pass x0
    if ~isstruct(options) && ~isempty(options)
        warning(message('MATLAB:lsqnonneg:ignoringX0'));
        % No options passed, set to empty
        options = [];
    end
end
