# Supplementary material for: Compressed Sensing in On-Grid MIMO Radar
Source: ScientificWorldJournal. 2015 Sep 30;2015:397878. doi: 10.1155/2015/397878 (PMC4870333; doi:10.1155/2015/397878)
Supplement: Supplementary file 1 — The Supplementary Material accompanying this paper is a TAR file containing the MATLAB files needed to reproduce the results of the paper. These include the exact code used in each experiment, the resulting data sets from each experiment, and the code to generate the plots for each of these data sets. [file 397878.f1.tar › MFM_Radar_Reproducibles-2015-08-21/MFM_Radar_Reproducibles/Experiments/nonneglsqT.m]

function u = nonneglsqT(A,f)
% modified for time constraint
n=size(A,2);
u = A\f;
numerr=100*eps*norm(A,1)*length(A);
test = any(u<-numerr);
stopcrit=0;
u(u<0)=0;
timer1=tic; % timer1
if test 
    indset = logical(u<numerr);
    while ~stopcrit && toc(timer1)<= 300
        %compute temporary solution
        utemp = zeros(n,1);
        utemp(~indset) = A(:,~indset)\f;
        timer2=tic; %timer2
        while any(utemp(~indset)<=numerr) && toc(timer2)<=120
            indsettemp = (utemp<=numerr) & ~indset;
            t = min(u(indsettemp)./(u(indsettemp)-utemp(indsettemp)));
            u = u + t*(utemp-u);
            indset = (u<=numerr)&(~indset) | indset;
            utemp = zeros(n,1);
            utemp(~indset)=A(:,~indset)\f;
        end
        u = utemp;
        u(u<0)=0;
       resid = (f-A*u);
       mingradenerg = A'*resid;
       [~, ind] = max(mingradenerg.*indset);
       indset(ind)=false;
       if (max((mingradenerg(~indset)))<numerr)
           stopcrit=1;
       end
    end
end
