# Supplementary material for: Compressed Sensing in On-Grid MIMO Radar
Source: ScientificWorldJournal. 2015 Sep 30;2015:397878. doi: 10.1155/2015/397878 (PMC4870333; doi:10.1155/2015/397878)
Supplement: Supplementary file 1 — The Supplementary Material accompanying this paper is a TAR file containing the MATLAB files needed to reproduce the results of the paper. These include the exact code used in each experiment, the resulting data sets from each experiment, and the code to generate the plots for each of these data sets. [file 397878.f1.tar › MFM_Radar_Reproducibles-2015-08-21/MFM_Radar_Reproducibles/Experiments/omp.m]

%OMP Orthogonal Matching Pursuit
% OMP(y,A) runs the Orthogonal Matching Pursuit started with x0=0
% Usage: [x,S,NormRes,NbIter] = omp(y,A,S0,MaxNbIter,TolRes)
% y: column vector, A: matrix, S0: initial index set (optional,
% default=[]), MaxNbIter: number of iterations not to be exceeded (optional, default=number of rows of A), TolRes:
% threshold value for the L2-norm of the residual under which the alsogithm
% is stopped (optional, default=1e-4)
% x: column vector, S: support of x, NormRes: the norm of the residual,
% NbIter: the number of performed iterations
% Simon Foucart (created 25/05/2012, modified 25/05/2012)
% NOTE: the matrix A is column-normalized before OMP is run
function [x,S,NormRes,NbIter] = omp(y,A,S0,MaxNbIter,TolRes)

[m,N]=size(A);
if nargin < 5
   TolRes=1e-4; 
end
if nargin < 4
   MaxNbIter=m;
end
if nargin < 3
   S0=[]; 
end

[A,d]=nzedcol(A);
S=S0;
AS=A(:,S);
xS=AS\y;
res=y-AS*xS;
NormRes=norm(res);
NbIter=0;


while ( NbIter < MaxNbIter && NormRes > TolRes )
    [~,j]=max(abs(A'*res));
    S=sort([S, j]);
    AS=A(:,S);
    xS=AS\y;
    res=y-AS*xS;
    NormRes=norm(res);
    NbIter=NbIter+1;
end

x=zeros(N,1); x(S)=diag(1./d(S))*xS;

end
