# Supplementary material for: Compressed Sensing in On-Grid MIMO Radar
Source: ScientificWorldJournal. 2015 Sep 30;2015:397878. doi: 10.1155/2015/397878 (PMC4870333; doi:10.1155/2015/397878)
Supplement: Supplementary file 1 — The Supplementary Material accompanying this paper is a TAR file containing the MATLAB files needed to reproduce the results of the paper. These include the exact code used in each experiment, the resulting data sets from each experiment, and the code to generate the plots for each of these data sets. [file 397878.f1.tar › MFM_Radar_Reproducibles-2015-08-21/MFM_Radar_Reproducibles/Experiments/TargetScene.m]

function [ signal, grid, supp] = TargetScene(P,U,V,W,K)
% P must be positive integer
% Michael F Minner

signal=zeros(K,1);            % initialize the signal

% build support in azimuth and range, then add Doppler
grid=zeros(3,P);
grid(:,1)=[randsample(U,1);randsample(V,1);randsample(W,1)];   % first target location
flag=1;
while flag<P
    ii=randsample(U,1);       % possible azimuth and range location
    jj=randsample(V,1);
    if max((ii==grid(1,:))+(jj==grid(2,:)))~=2  % check if bin is unoccupied
        kk=randsample(W,1);   % doppler for target
        flag=flag+1;
        grid(:,flag)=[ii;jj;kk]; % add new target to support
    end
end
supp=sort(SceneLocate(grid(1,:),grid(2,:),grid(3,:),U,V,W));


end
