# Supplementary material for: Compressed Sensing in On-Grid MIMO Radar
Source: ScientificWorldJournal. 2015 Sep 30;2015:397878. doi: 10.1155/2015/397878 (PMC4870333; doi:10.1155/2015/397878)
Supplement: Supplementary file 1 — The Supplementary Material accompanying this paper is a TAR file containing the MATLAB files needed to reproduce the results of the paper. These include the exact code used in each experiment, the resulting data sets from each experiment, and the code to generate the plots for each of these data sets. [file 397878.f1.tar › MFM_Radar_Reproducibles-2015-08-21/MFM_Radar_Reproducibles/Experiments/yall1.m]

function [x, Out] = yall1(A, b, opts)
%
% A solver for L1-minimization models:
%
% min ||Wx||_{w,1}, st Ax = b
% min ||Wx||_{w,1} + (1/nu)||Ax - b||_1
% min ||Wx||_{w,1} + (1/2*rho)||Ax - b||_2^2
% min ||x||_{w,1}, st Ax = b                and x > = 0
% min ||x||_{w,1} + (1/nu)||Ax - b||_1,      st x > = 0
% min ||x||_{w,1} + (1/2*rho)||Ax - b||_2^2, st x > = 0
%
% where (A,b,x) can be complex or real 
% (but x must be real in the last 3 models)
%
% Copyright(c) 2009-2011 Yin Zhang, Junfeng Yang, Wotao Yin
%
% --- Input:
%     A --- either an m x n matrix or
%           a structure with 2 fields:
%           1) A.times: a function handle for A*x
%           2) A.trans: a function handle for A'*y
%     b --- an m-vector, real or complex
%  opts --- a structure with fields:
%           opts.tol   -- tolerance *** required ***
%           opts.nu    -- values > 0 for L1/L1 model
%           opts.rho   -- values > 0 for L1/L2 model
%           opts.basis -- sparsifying unitary basis W (W*W = I)
%                        a struct with 2 fields:
%                        1) times: a function handle for W*x
%                        2) trans: a function handle for W'*y
%           opts.nonneg  -- 1 for nonnegativity constraints
%           opts.nonorth -- 1 for A with non-orthonormal rows
%           see the User's Guide for all other options
%
% --- Output: 
%     x --- last iterate (hopefully an approximate solution)
%   Out --- a structure with fields:
%           Out.exit    --- exit information
%           Out.iter    --- #iterations taken
%           Out.cputime --- solver CPU time
%           Out.y       --- dual variable
%           Out.z       --- dual slack
%           .....       --- and some more
% --------------------------------------------------------------
% define linear operators
[A,At,b,opts] = linear_operators(A,b,opts);

m = length(b);
L1L1 = isfield(opts,'nu') && opts.nu > 0;
if L1L1 && isfield(opts,'weights')
    opts.weights = [opts.weights(:); ones(m,1)];
end

% parse options
posrho = isfield(opts,'rho')    && opts.rho > 0;
posdel = isfield(opts,'delta')  && opts.delta > 0;
posnu  = isfield(opts,'nu')     && opts.nu > 0;
nonneg = isfield(opts,'nonneg') && opts.nonneg == 1;
if isfield(opts,'x0'); x0 = opts.x0; else x0 = []; end 
if isfield(opts,'z0'); z0 = opts.z0; else z0 = []; end 

% check conflicts % modified by Junfeng
if posdel && posrho || posdel && posnu || posrho && posnu
    fprintf('Model parameter conflict! YALL1: set delta = 0 && nu = 0;\n');
    opts.delta = 0; posdel = false;
    opts.nu    = 0; posnu  = false;
end
prob = 'the basis pursuit problem';
if posrho, prob = 'the unconstrained L1L2 problem'; end
if posdel, prob = 'the constrained L1L2 problem';   end
if posnu,  prob = 'the unconstrained L1L1 problem'; end
disp(['YALL1 is solving ', prob, '.']);

% check zero solution % modified by Junfeng
Atb = At(b);
bmax = norm(b,inf);
L2Unc_zsol = posrho && norm(Atb,inf) <= opts.rho;
L2Con_zsol = posdel && norm(b) <= opts.delta;
L1L1_zsol  = posnu  && bmax < opts.tol;
BP_zsol    = ~posrho && ~posdel && ~posnu && bmax < opts.tol;
zsol = L2Unc_zsol || L2Con_zsol || BP_zsol || L1L1_zsol;
if zsol  
    n = length(Atb);
    x = zeros(n,1); 
    Out.iter = 0;
    Out.cntAt = 1;
    Out.cntA = 0;
    Out.exit = 'Data b = 0';
    return; 
end
% ========================================================================

% scaling data and model parameters
b1 = b / bmax;
if posrho, opts.rho   = opts.rho / bmax; end
if posdel, opts.delta = opts.delta / bmax; end
if isfield(opts,'xs'), opts.xs = opts.xs/bmax; end
    
% solve the problem
t0 = cputime; 
[x1,Out] = yall1_solve(A, At, b1, x0, z0, opts);
Out.cputime = cputime - t0;

% restore solution x
x = x1 * bmax;
if L1L1; x = x(1:end-m); end
if isfield(opts,'basis')
    x = opts.basis.trans(x);
end
if nonneg; x = max(0,x); end

end

%%%%%%%%%%%%%%%%%%%%%%%%%%%%%%%%%%%%%%%%%%%%%%%%%%%%%%%
function [A,At,b,opts] = linear_operators(A0, b0, opts)
%
% define linear operators A and At 
% (possibly modify RHS b if nu > 0)
%
b = b0;
if isnumeric(A0); 
    if size(A0,1) > size(A0,2); 
        error('A must have m < n');
    end
    A  = @(x) A0*x;
    At = @(y) (y'*A0)';
elseif isstruct(A0) && isfield(A0,'times') && isfield(A0,'trans');
    A  = A0.times;
    At = A0.trans;
elseif isa(A0,'function_handle')
    A  = @(x) A0(x,1);
    At = @(x) A0(x,2);
else
    error('A must be a matrix, a struct or a function handle');
end

% use sparsfying basis W
if isfield(opts,'basis')
    C = A; Ct = At; clear A At; 
    B  = opts.basis.times;
    Bt = opts.basis.trans;
    A  = @(x) C(Bt(x));
    At = @(y) B(Ct(y));
end

% solving L1-L1 model if nu > 0
if isfield(opts,'nu') && opts.nu > 0
    C = A; Ct = At; clear A At; 
    m = length(b0);
    nu = opts.nu; 
    t = 1/sqrt(1 + nu^2);
    A  = @(x) ( C(x(1:end-m)) + nu*x(end-m+1:end) )*t;
    At = @(y) [ Ct(y);  nu*y ]*t;
    b = b0*t;
end

if ~isfield(opts,'nonorth'); 
    opts.nonorth = check_orth(A,At,b); 
end

end

%%%%%%%%%%%%%%%%%%%%%%%%%%%%%%%%%%%%%%%%
function nonorth = check_orth(A, At, b)
%
% check whether the rows of A are orthonormal
%
nonorth = 0;
s1 = randn(size(b));
s2 = A(At(s1));
err = norm(s1-s2)/norm(s1);
if err > 1.e-12; nonorth = 1; end
end


%%%%%%%%%%%%%%%%%%%%%%%%%%%%%%%%%%%%%%%%%%%%%%%%%%
%%%%                   solver                %%%%%
%%%%%%%%%%%%%%%%%%%%%%%%%%%%%%%%%%%%%%%%%%%%%%%%%%
function [x, Out] = yall1_solve(A,At,b,x0,z0,opts)

% yall1_solve version 1.4 (July, 2011)
% Copyright(c) 2009-2011 Yin Zhang

%% initialization
m = length(b); bnrm = norm(b);
[tol,mu,maxit,print,nu,rho,delta, ... 
    w,nonneg,nonorth,gamma] = get_opts;
x = x0; z = z0;
if isempty(x0); x = At(b); end
n = length(x); 
if isempty(z0), z = zeros(n,1); end
if isfield(opts,'nonorth') && opts.nonorth > 0
    y = zeros(m,1); Aty = zeros(n,1); 
end
if print; fprintf('--- YALL1 v1.4 ---\n'); end
if print; iprint1(0); end;

mu_orig = mu;
rdmu = rho / mu;
rdmu1 = rdmu + 1;
bdmu = b / mu;
ddmu = delta / mu;

Out.cntA = 0; Out.cntAt = 0;
rel_gap = 0;  rel_rd  = 0;
rel_rp  = 0;  stop = 0;

%% main iterations
for iter = 1:maxit
    
    %% calculations
    xdmu = x / mu;
    if ~nonorth; % orthonormal A
        y = A(z - xdmu) + bdmu;
        if rho > 0;
            y = y / rdmu1;
        elseif delta > 0
            y = max(0, 1 - ddmu/norm(y))*y;
        end
        Aty = At(y);
    else     % non-orthonormal A
        ry = A(Aty - z + xdmu) - bdmu;
        if rho > 0; ry = ry + rdmu*y; end
        Atry = At(ry);
        denom = Atry'*Atry;
        if rho > 0, denom = denom + rdmu * (ry'*ry); end
        stp = real(ry'*ry)/(real(denom) + eps);
        Out.cntAt = Out.cntAt + 1;
        y = y - stp*ry;
        Aty = Aty - stp*Atry;
    end
    
    z = Aty + xdmu;
    z = proj2box(z,w,nonneg,nu,m);
    
    Out.cntA  = Out.cntA  + 1;
    Out.cntAt = Out.cntAt + 1;

    rd = Aty - z; xp = x;
    x = x + (gamma*mu) * rd;
        
    %% other chores
    if rem(iter,2) == 0, 
        check_stopping; update_mu; 
    end
    if print > 1; iprint2; end
    if stop; break; end 
    
end % main iterations

% output
Out.iter = iter;
Out.mu = [mu_orig mu];
Out.obj = [objp objd];
Out.y = y; Out.z = z;

if iter == maxit; Out.exit = 'Exit: maxiter'; end
if print; iprint1(1); end

%% nested functions
    function [tol,mu,maxit,print,nu,rho,delta, ...
             w,nonneg,nonorth,gamma] = get_opts
        % get or set options
        tol = opts.tol;
        mu = mean(abs(b)); 
        %mu = norm(b)/numel(b);
        maxit = 9999;
        print = 0;
        nu = 0;
        rho = eps;
        delta = 0;
        w = 1;
        nonneg = 0;
        nonorth = 0;
        gamma = 1.; % ADM parameter
        if isfield(opts,'mu');       mu = opts.mu;    end
        if isfield(opts,'maxit'); maxit = opts.maxit; end
        if isfield(opts,'print'); print = opts.print; end        
        if isfield(opts,'nu');       nu = opts.nu;    end
        if isfield(opts,'rho');     rho = opts.rho;   end
        if isfield(opts,'delta'); delta = opts.delta; end
        if isfield(opts,'weights'); w = opts.weights; end
        if isfield(opts,'nonneg');   nonneg = opts.nonneg;  end
        if isfield(opts,'nonorth'); nonorth = opts.nonorth; end
        if isfield(opts,'gamma');   gamma   = opts.gamma;   end
    end

    function z = proj2box(z,w,nonneg,nu,m)
        if nonneg
            z = min(w,real(z));
            if nu > 0 %L1L1 model
                z(end-m:end) = max(-1,z(end-m:end));
            end
        else
            z = z .* w ./ max(w,abs(z));
        end
    end

    function check_stopping
        q = 0.1; % q in [0,1)
        if delta > 0; q = 0; end
        % dual residual
        rdnrm = norm(rd); 
        rel_rd = rdnrm / norm(z);
        % duality gap
        objp = sum(abs(w.*x));
        objd = b'*y;
        if delta > 0, objd = objd - delta*norm(y); end
        if rho > 0
            rp = A(x) - b; 
            rpnrm = norm(rp); 
            Out.cntA = Out.cntA + 1;
            objp = objp + (0.5/rho)*rpnrm^2;
            objd = objd - (0.5*rho)*norm(y)^2;
        end
        rel_gap = abs(objd - objp)/abs(objp);
        
        % check relative change
        xrel_chg = norm(x-xp)/norm(x);
        if xrel_chg < tol*(1 - q)
            Out.exit = 'Exit: Stablized'; 
            stop = 1; return; 
        end
        
        % decide whether to go further
        if xrel_chg >= tol*(1 + q); return; end
        gap_small = rel_gap < tol;
        if ~gap_small; return; end
        d_feasible = rel_rd < tol;
        if ~d_feasible; return; end

        % check primal residual
        if rho == 0, 
            rp = A(x) - b; 
            rpnrm = norm(rp);
            Out.cntA = Out.cntA + 1; 
        end;    
        if rho > 0;
            p_feasible = true;
        elseif delta > 0
            p_feasible = rpnrm <= delta*(1 + tol);
        else
            p_feasible = rpnrm < tol*bnrm;
        end
        if p_feasible, stop = 1; Out.exit = 'Exit: Converged'; end        
    end

    function iprint1(mode)
        switch mode;
            case 0; % at the beginning
                rp = A(x) - b;
                rpnrm = norm(rp);
                fprintf(' norm( A*x0 - b ) = %6.2e\n',rpnrm);
            case 1; % at the end
                rp = A(x) - b;
                objp = sum(abs(w.*x));
                objd = b'*y;
                if rho > 0
                    objp = objp + (0.5/rho)*(rp'*rp);
                    objd = objd - (0.5*rho)*( y'*y );
                end
                if delta > 0; objd = objd - delta*norm(y); end
                dgap = abs(objd - objp);
                rel_gap = dgap / abs(objp);
                rdnrm = norm(rd);
                rel_rd = rdnrm / norm(z);
                rpnrm = norm(rp);
                rel_rp = rpnrm / bnrm;
                fprintf(' Rel_Gap   Rel_ResD  Rel_ResP\n');
                fprintf(' %8.2e  %8.2e  %8.2e\n',rel_gap,rel_rd,rel_rp);
        end
    end

    function iprint2
        rdnrm = norm(rd);
        rp = A(x) - b;
        rpnrm = norm(rp);
        objp = sum(abs(w.*x));
        objd = b'*y;
        if rho > 0
            objp = objp + (0.5/rho)*rpnrm^2;
            objd = objd - (0.5*rho)*(y'*y);
        end
        if delta > 0; 
            objd = objd - delta*norm(y); 
        end
        gap = abs(objd - objp);
        if ~rem(iter,50)
            fprintf('  Iter %4i:' ,iter);
            fprintf('  Rel_Gap  %6.2e',gap/objp);
            fprintf('  Rel_ResD %6.2e',rdnrm/norm(z));
            fprintf('  Rel_ResP %6.2e',norm(rp)/norm(b));
            fprintf('\n');
        end
        
        if ~isfield(opts,'xs'), return; end
        if isfield(opts,'nu') && opts.nu, return; end
        
        if iter <= 1, 
            Out.objd = []; Out.rd = []; 
            Out.objp = []; Out.rp = [];
            opts.xsnrm = norm(opts.xs);
            Out.relerr = [];
        end
        Out.objd = [Out.objd objd];
        Out.objp = [Out.objp objp];
        Out.rd = [Out.rd rdnrm];
        Out.rp = [Out.rp rpnrm];
        err = norm(x-opts.xs)/opts.xsnrm;
        Out.relerr = [Out.relerr err];
    end

    function update_mu    % added to v14
        mfrac = 0.1; big = 50; nup = 8;
        mu_min = mfrac^nup * mu_orig;
        do_update = rel_gap > big*rel_rd;
        do_update = do_update && mu > 1.1*mu_min;
        do_update = do_update && iter > 10;
        if ~do_update, return; end
        % do update
        mu = max(mfrac*mu,mu_min);
        rdmu = rho / mu; rdmu1 = rdmu + 1;
        bdmu = b / mu; ddmu = delta / mu;
        if print>1; fprintf('  -- mu updated\n'); end
    end

end
