# Supplementary material for: Compressed Sensing in On-Grid MIMO Radar
Source: ScientificWorldJournal. 2015 Sep 30;2015:397878. doi: 10.1155/2015/397878 (PMC4870333; doi:10.1155/2015/397878)
Supplement: Supplementary file 1 — The Supplementary Material accompanying this paper is a TAR file containing the MATLAB files needed to reproduce the results of the paper. These include the exact code used in each experiment, the resulting data sets from each experiment, and the code to generate the plots for each of these data sets. [file 397878.f1.tar › MFM_Radar_Reproducibles-2015-08-21/MFM_Radar_Reproducibles/README.m]

%% README FILE for "Compressed Sensing in On-Grid MIMO Radar"
% by Michael F Minner.
%
% This folder contains the files needed to reproduce the results
% contained within the paper. These include:
%    The exact code used in each experiment.
%    The resulting data sets from each experiment.
%    MATLAB code to generate the plots for each of these data sets.

% DATA AND PLOTS
%
% These folders contain the data resulting from each experiment 
% (file type '.mat') along with code ('...Plots.m')  to generate 
% the figures contained within the paper (file type '.fig')and 
% additional plots for further analysis.
%
% In order to utilize the '...Plots.m' files, first load the appropriate
% data set then run the desired file.
%
% Note: 'Experiment_4_Plots.m' will automatically load the data due to the
% complexity of the plots.
%
%

% EXPERIMENTS FOLDER
%
% This folder contains all code needed to run the 5 separate experiments.
%
% NOTE: These experiments were run on a server and can take as little as a few 
% hours to 30+ hours to complete depending on hardware specifications
% and problem size.
%
% Please see the paper for references for the associated algorithms used,
% namely for L1 Square Non Negative Regularization,
% L1/L2 Constrained Non Negative from YALL1 and 
% the Adaptive Inverse Scale Space Method.
%
% Experiment_1.m
% Compare different algorithms at different sparsity levels 
% with a fixed SNR and a fixed threshold value.
%
% NOTE: Because the Adaptive Inverse Scale Space Method is not
% publicly available, it has been removed from the folder.
% The original code to use it has been left in but is commented out.
% The results, however, are still available in the folder labeled
% "Experiment 1 Data and Results."
%
% Experiment_2.m
% Compare Random array and Uniform Linear Array (ULA).
% 
% Experiment_3.m
% Compare ROC Curves for L1SQNN as the sparsity varies.
% Compare ROC Curves for L1SQNN as the SNR varies.
%
% Experiment_4.m
% Generate families of ROC Curves for L1SQNN as parameter lambda varies
% at different values of SNR and separate sparsity levels.
%
% Experiment_5.m
% Compare ROC Curves for L1SQNN as when the problem size is increased.
%
% NOTE: Experiment 5 uses a modified built-in MATLAB function (noneglsq)
% purely to save time as it can, at times, seem to run indefinitely.
%
% Experiment_6.m
% Compare ROC Curves for L1SQNN as the bandwidth changes value.
%
%
